# Supplementary material for: Synthesis of quinoline acetohydrazide-hydrazone derivatives evaluated as DNA gyrase inhibitors and potent antimicrobial agents
Source: Royal Society of Chemistry journal article supplement (doi:10.1039/c6ra09891f), 2016-01-01
Supplement: c6ra09891f1.pdf [file c6ra09891f1.pdf]

## Synthesis of quinoline acetohydrazide-hydrazone derivatives evaluated as DNA gyrase inhibitors and potent antimicrobial agents

P. Sridhar<sup>a</sup>, Manikandan Alagumuthu<sup>b</sup>, Sivakumar Arumugam<sup>b</sup>, Sabbasani Rajasekhara Reddy<sup>a,\*</sup>

<sup>a</sup>*Department of Chemistry, Scholl of Advanced Sciences, VIT University, Vellore-632014, India*

<sup>b</sup>*School of Bio-Science and Technology, VIT University, Vellore-632014, India.*

\*Corresponding author e-mail: [sekharareddy@vit.ac.in](mailto:sekharareddy@vit.ac.in) or [sekharareddyitm@gmail.com](mailto:sekharareddyitm@gmail.com)

Tel: +91-9884968303 Fax: +91-416-2243092, 2240411

### Supporting Information File

| Table of contents                                                                                   | Page No. |
|-----------------------------------------------------------------------------------------------------|----------|
| 1. Graphical representation (Scheme 1)                                                              | 2        |
| 2. Table 1. Anti-bacterial activity results (Zone of inhibition details)                            | 2        |
| 3. Compound <b>8</b> Spectra ( <sup>1</sup> H NMR and Mass)                                         | 3        |
| 4. Confirmation Spectra of ( <sup>1</sup> H NMR, <sup>13</sup> C NMR, FTIR, Mass& HRMS) <b>9a-n</b> | 4-25     |
| 5. DNA gyrase <b>A</b> and <b>B</b> PDB structures                                                  | 26       |
| 6. Table 2. DNA gyrase inhibition assay                                                             | 27       |

**Scheme 1:**

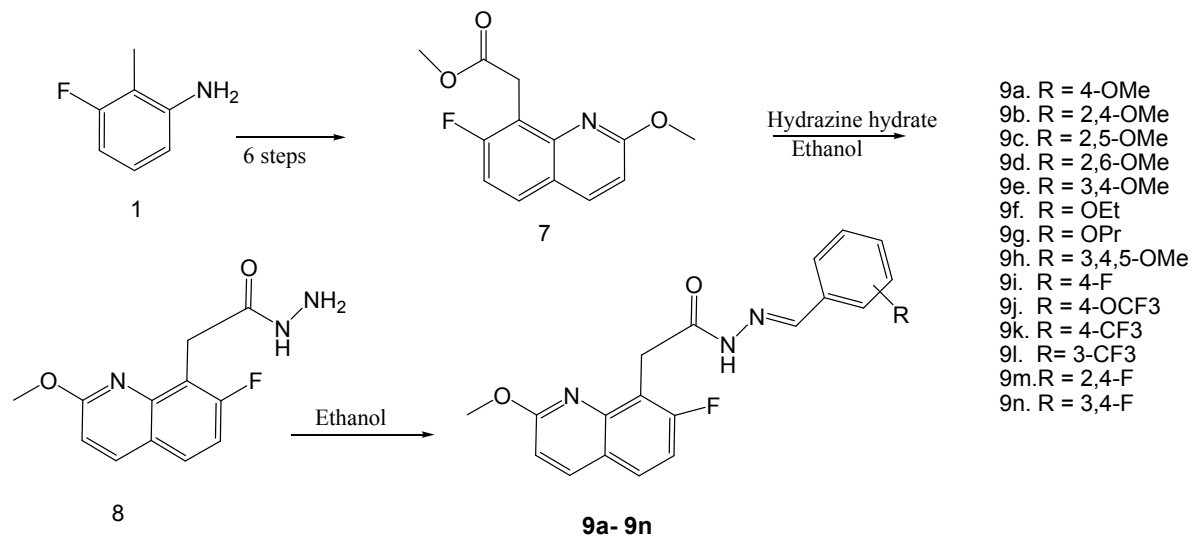

**Scheme 1:** Synthesis of novel Quinoline acetohydrazide derivatives 9a-9n

**Experimental Conditions:** a) cinnamoyl chloride, aq. NaHCO<sub>3</sub>, isopropyl acetate, room temperature, 30 min; b) AlCl<sub>3</sub>, chlorobenzene, 90 °C, 1 h; c) MeI, KtOBu, DMSO, 70 °C, 2.5 h; d) NBS, benzoyl peroxide, xylene, 70 °C, 1.5 h; e) KCN, DMF, 60 °C, 16 h; f) TMSiCl, MeOH, 70 °C, 2.5 h; g) NH<sub>2</sub>-NH<sub>2</sub>, ethanol, reflux, 20 h; h) benzaldehydes, **a-n**, ethanol, reflux, 4 h.

**Table 1-***In vivo* efficacy of quinoline acetohydrazide derivatives **9a-9n** for demonstrating antibacterial activity against selected pathogens

| Entry | Compounds  | Zone of inhibition (mM)** |                     |                 |                   |
|-------|------------|---------------------------|---------------------|-----------------|-------------------|
|       |            | <i>E.coli</i>             | <i>P.aeruginosa</i> | <i>S.aureus</i> | <i>S.pyogenes</i> |
| 1     | 9a         | 10                        | 10                  | 7               | 11                |
| 2     | 9b         | 9                         | 11                  | 8               | 9                 |
| 3     | 9c         | 8                         | 9                   | 7               | 10                |
| 4     | 9d         | 12                        | 12                  | 9               | 11                |
| 5     | 9e         | 11                        | 10                  | 7               | 11                |
| 6     | 9f         | 12                        | 10                  | 7               | 11                |
| 7     | 9g         | 11                        | 11                  | 9               | 12                |
| 8     | 9h         | 16                        | 17                  | 14              | 16                |
| 9     | 9i         | 17                        | 17                  | 13              | 15                |
| 10    | 9j         | 16                        | 15                  | 13              | 17                |
| 11    | 9k         | 17                        | 16                  | 14              | 17                |
| 12    | 9l         | 16                        | 17                  | 15              | 17                |
| 13    | 9m         | 21                        | 20                  | 18              | 20                |
| 14    | 9n         | 20                        | 19                  | 18              | 19                |
| 15    | Ampicillin | 19                        | 18                  | 16              | 18                |
| 16    | Control*   | -                         | -                   | -               | -                 |

\*DMSO, \*\*Diameter of well (bore size)- 6 mm; Culture strains of bacteria were maintained on nutrient agar slant at 37±0.5 °C for 24 h; All plates were incubated at 37±0.5 °C for 24 h.

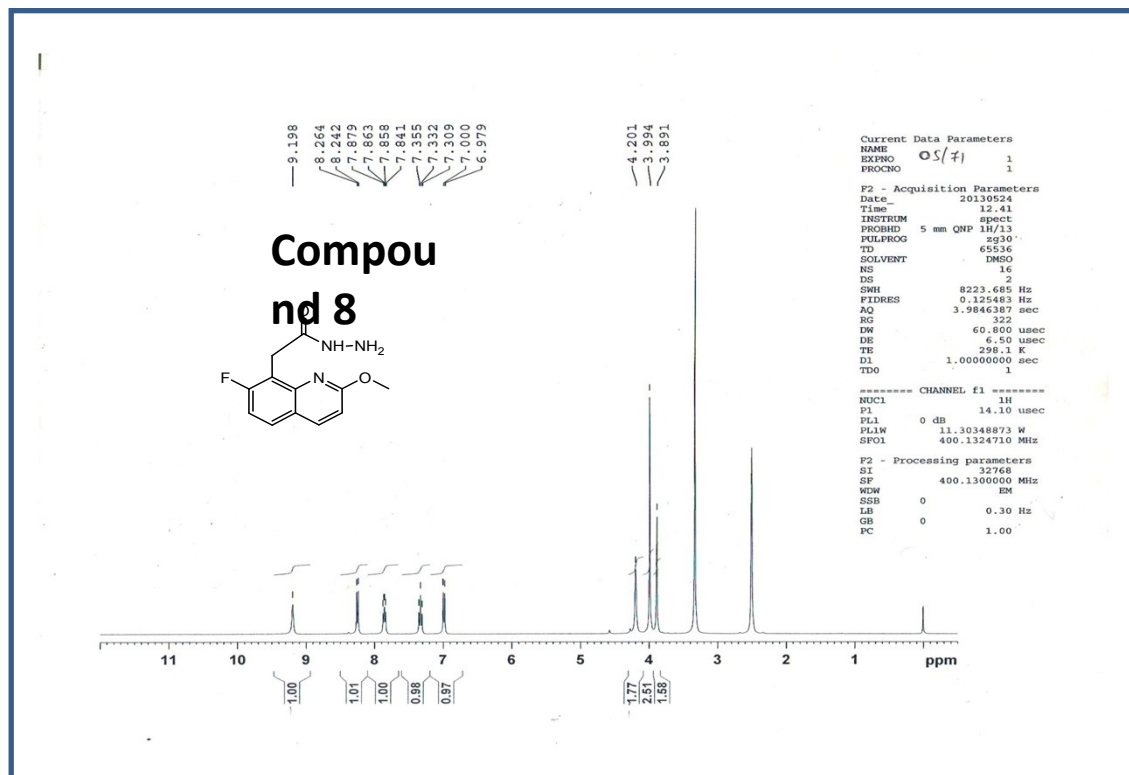

**Fig. 1:**  $^1\text{H}$  NMR spectrum of 2-(7-fluoro-2-methoxyquinolin-8-yl) acetohydrazide

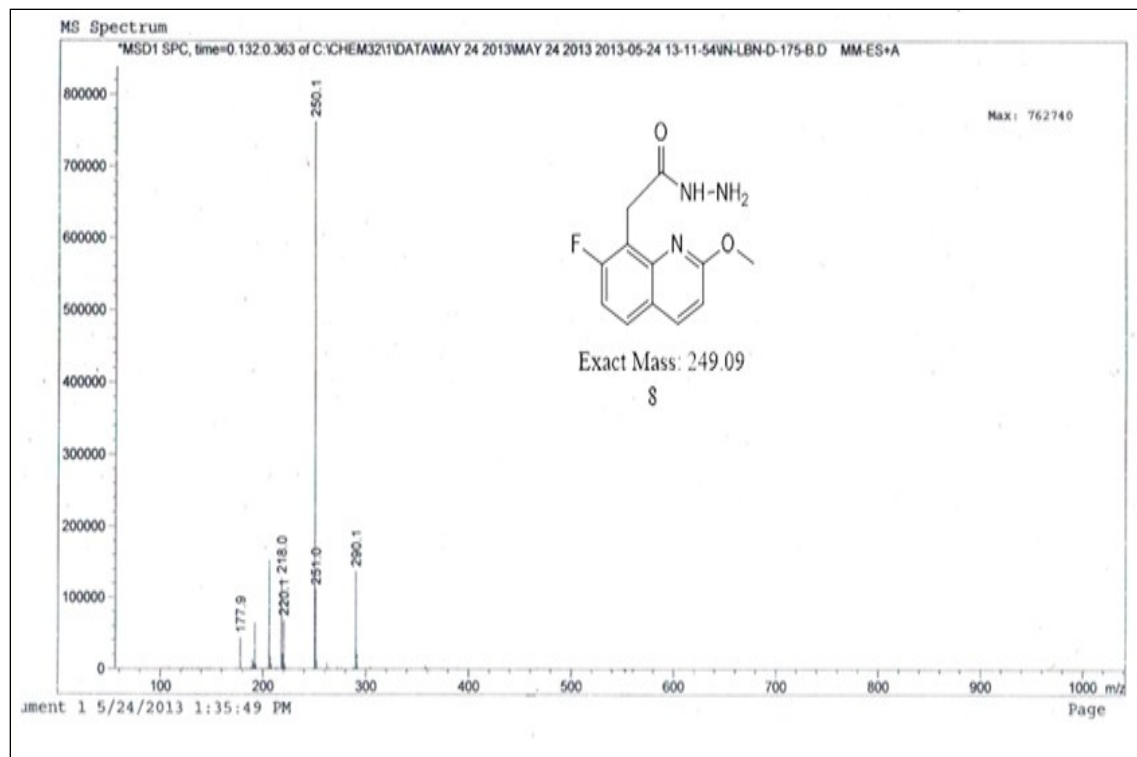

**Fig. 2:** Mass spectra of Compound 8

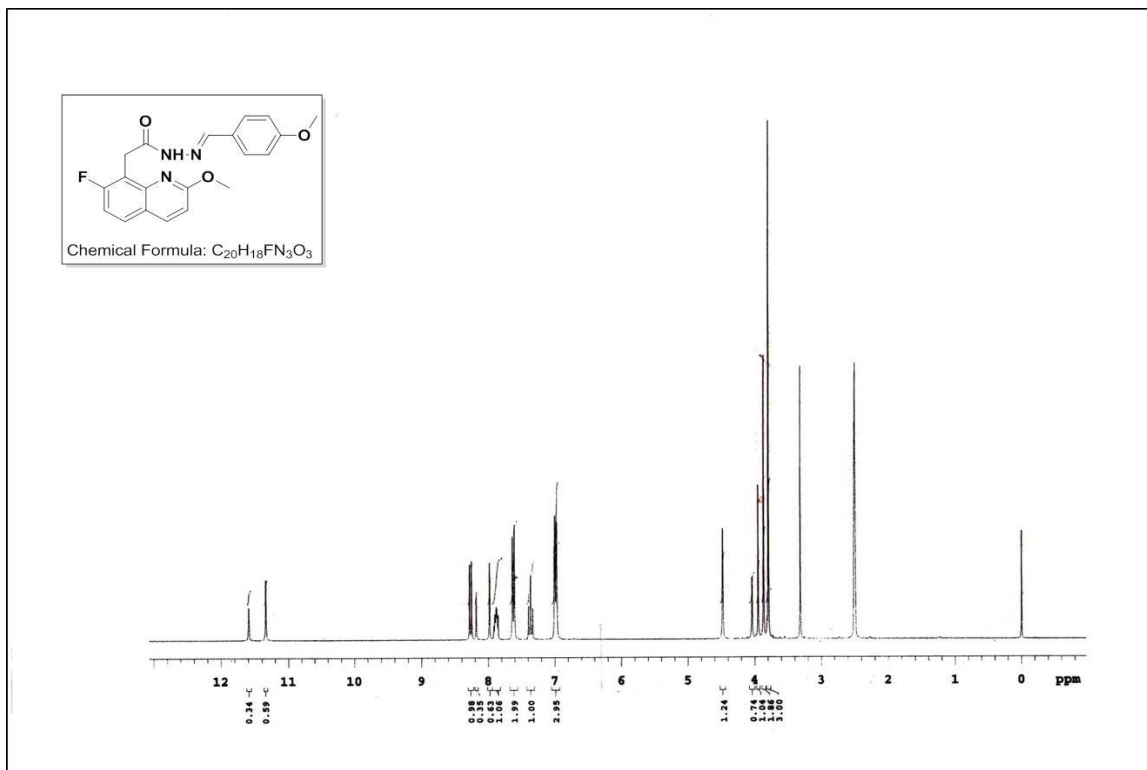

**Fig.3:** <sup>1</sup>H NMR spectra of **9a**

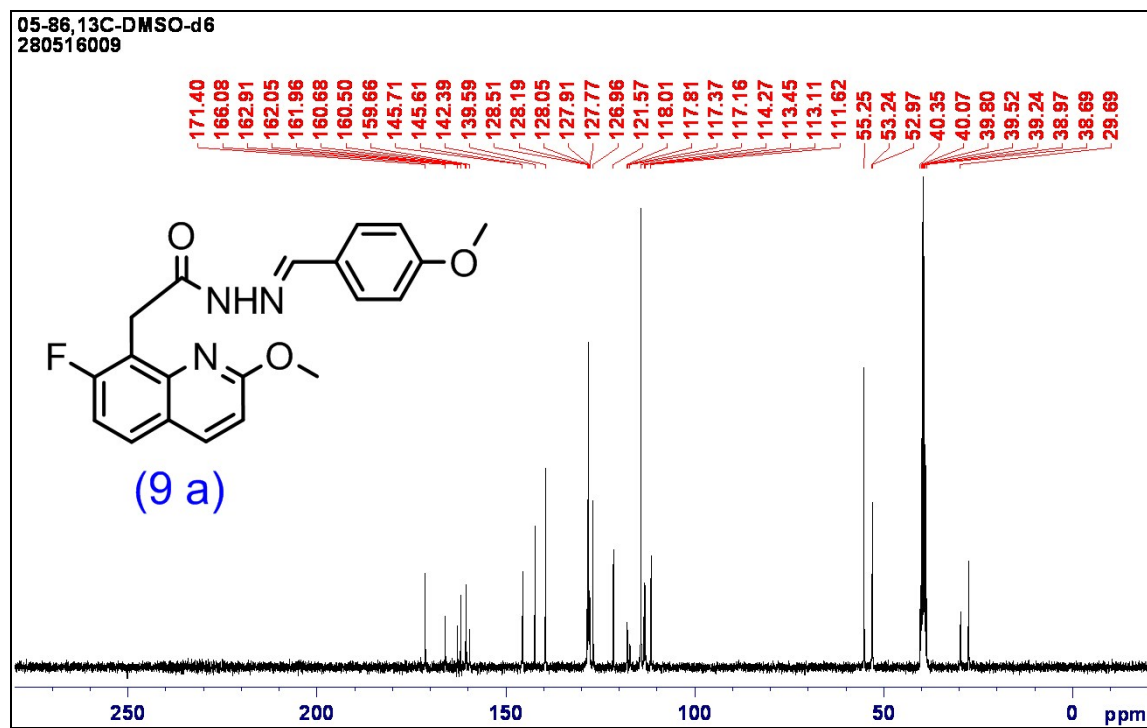

Fig.4. <sup>13</sup>C NMR spectra of 9a

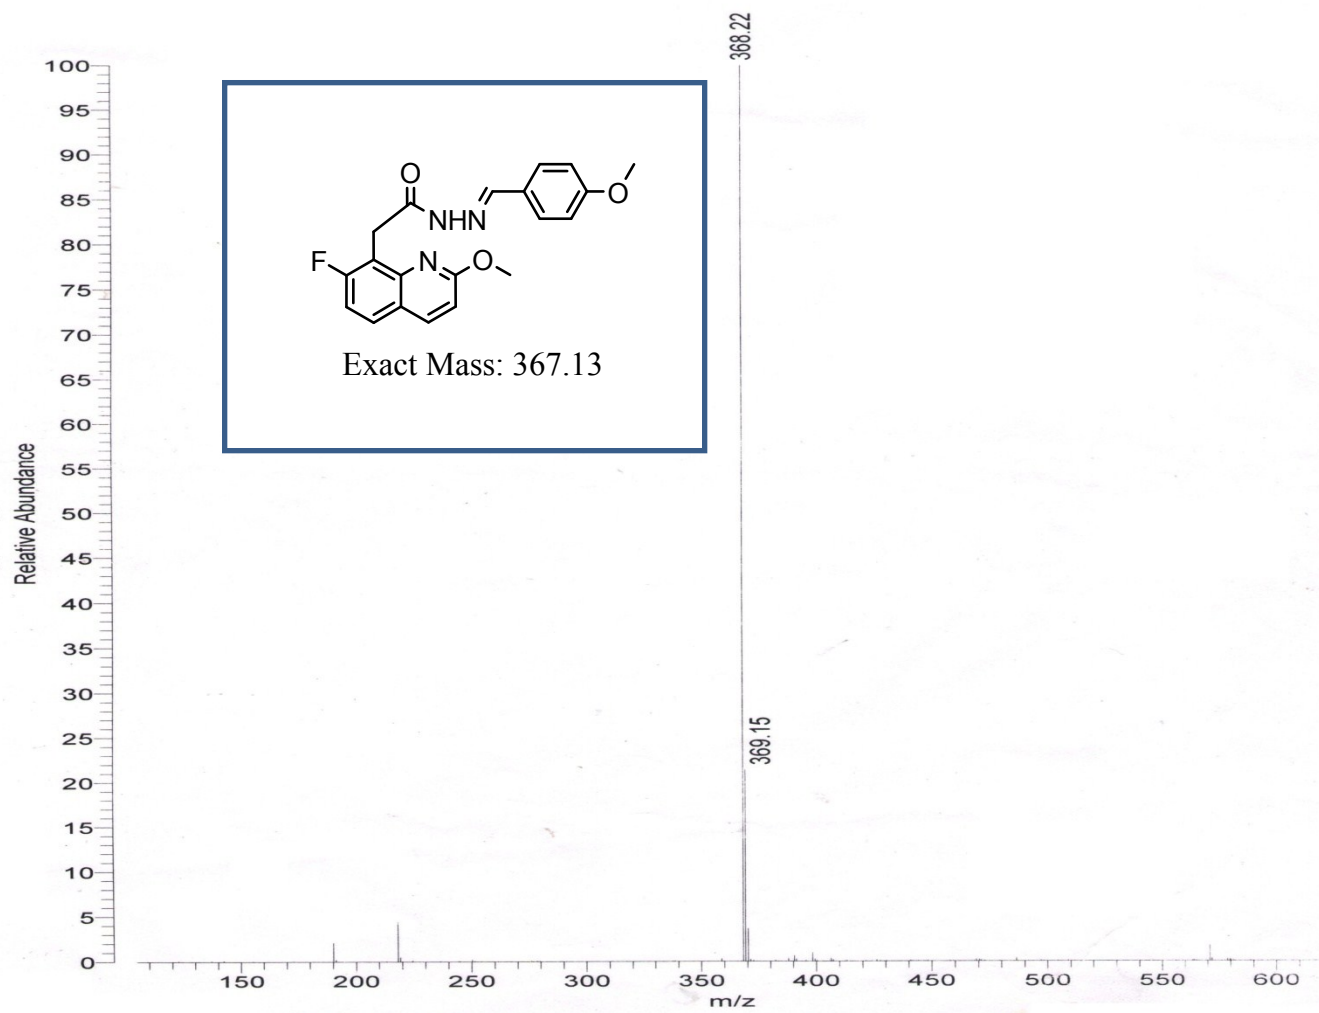

**Fig. 5.** Mass spectra of **9a**



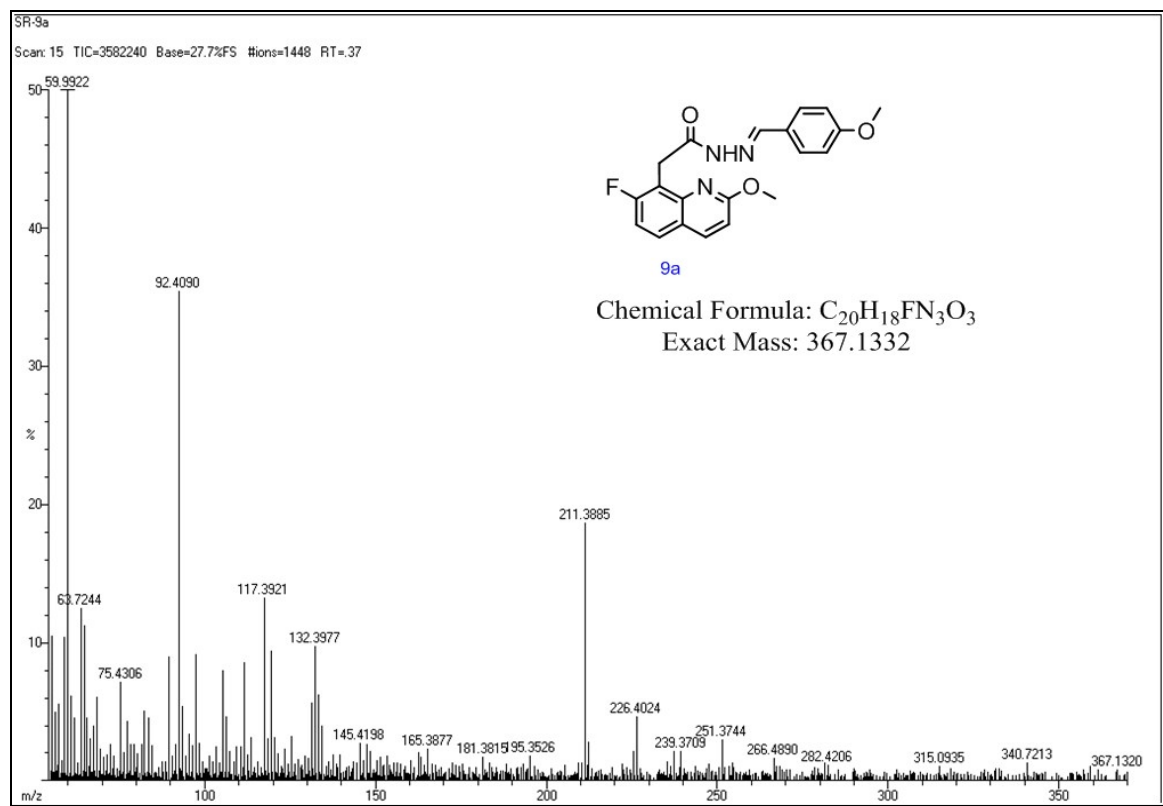

**Fig.6.** HRMS spectra of **9a**

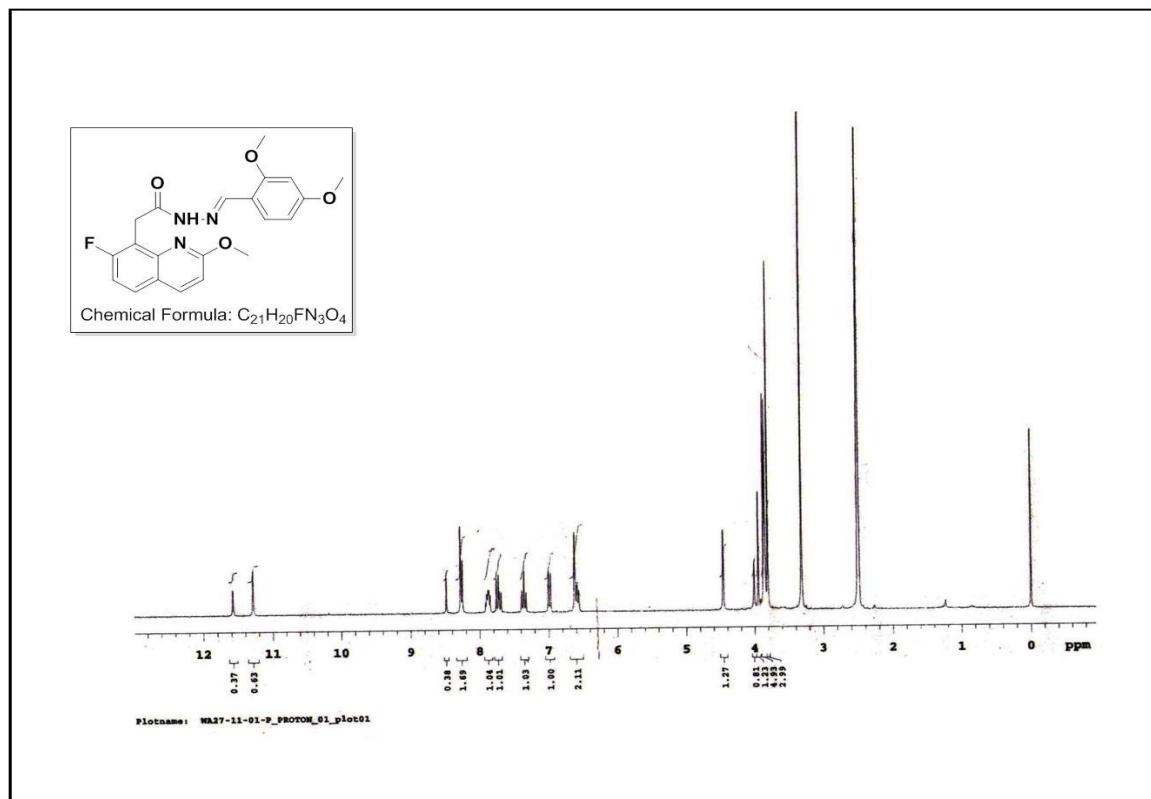

Fig. 7. <sup>1</sup>H NMR spectra of 9b

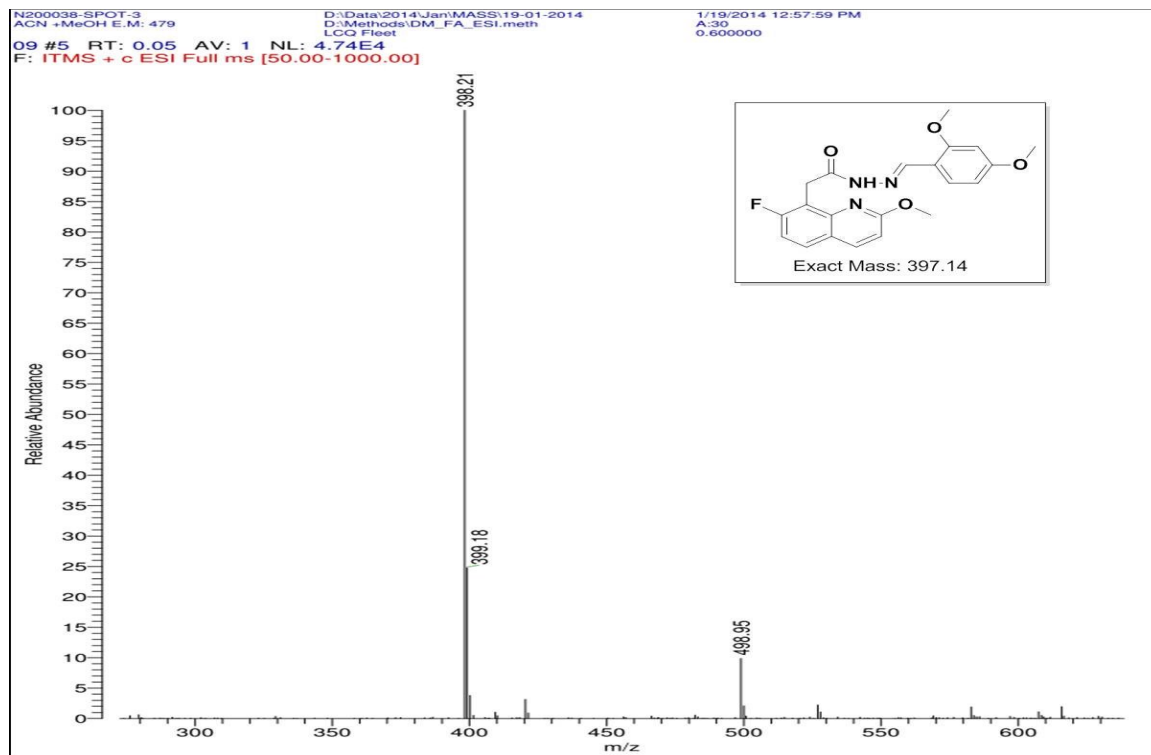

**Fig. 8.** Mass spectra of **9b**

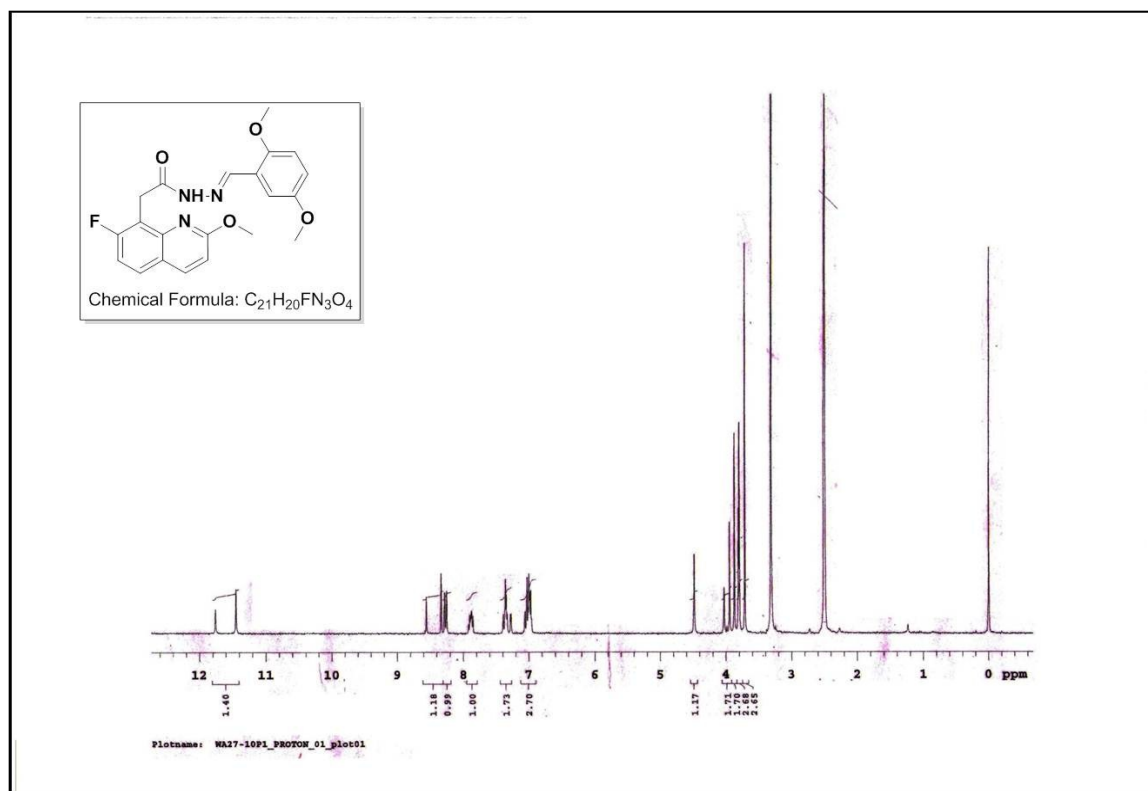

Fig. 9. <sup>1</sup>H NMR spectra of 9c

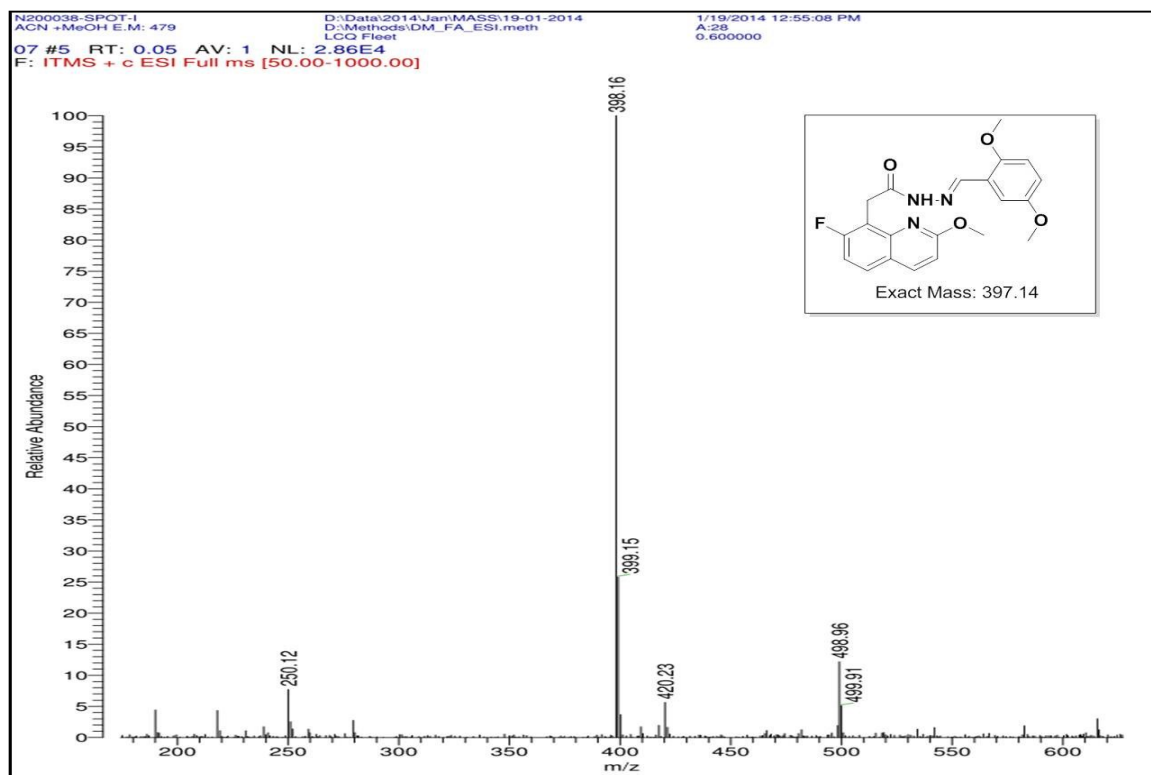

Fig. 10. Mass spectra of **9c**

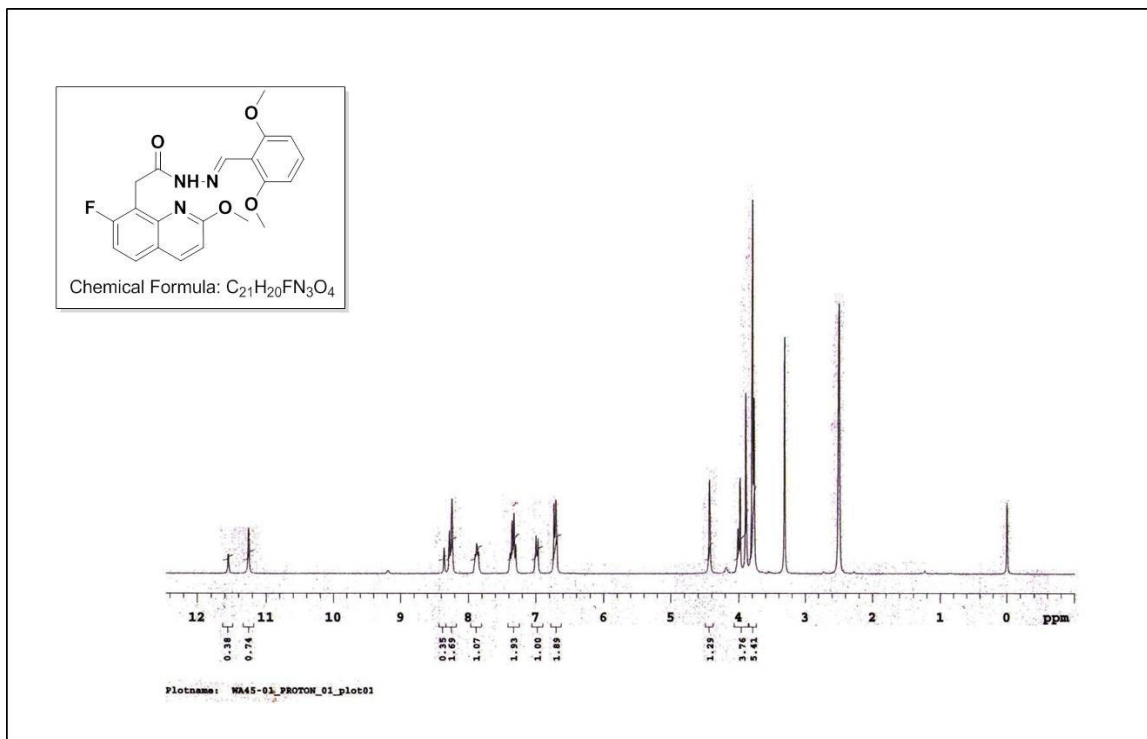

Fig. 11. <sup>1</sup>H NMR spectra of 9d

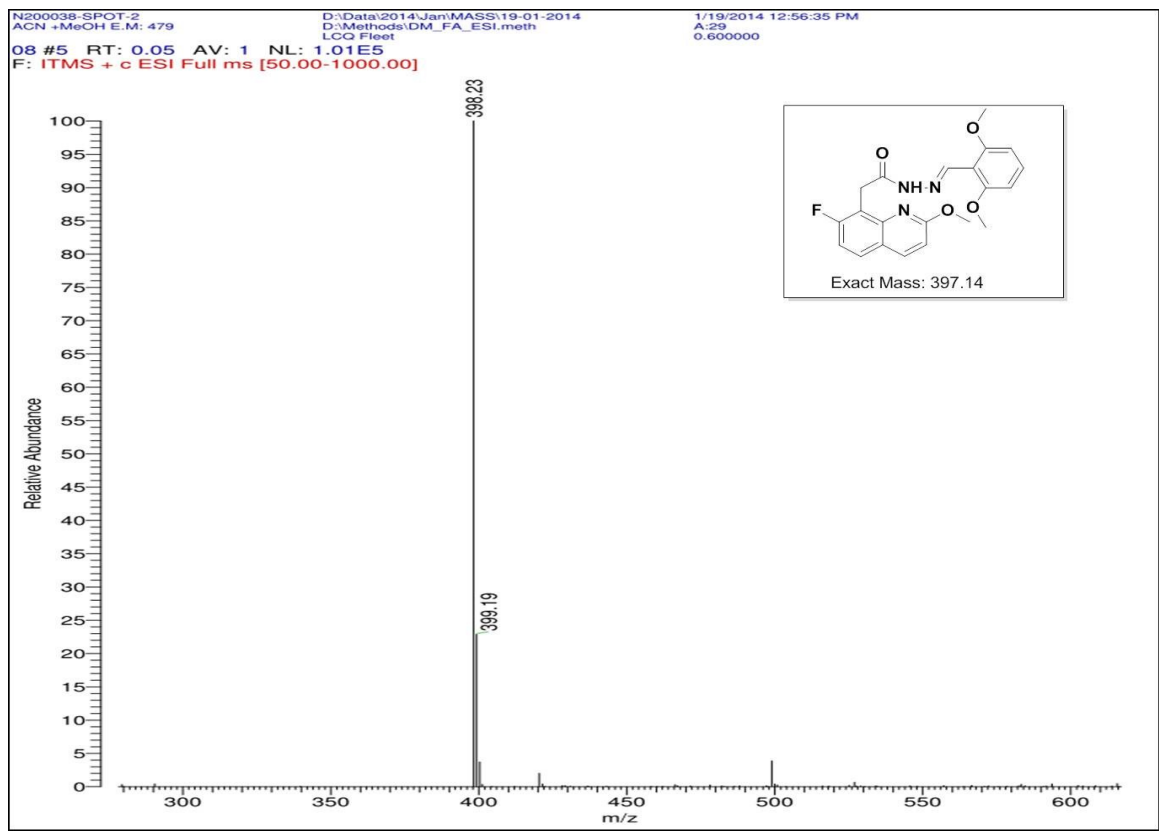

Fig. 12. Mass spectra of 9d

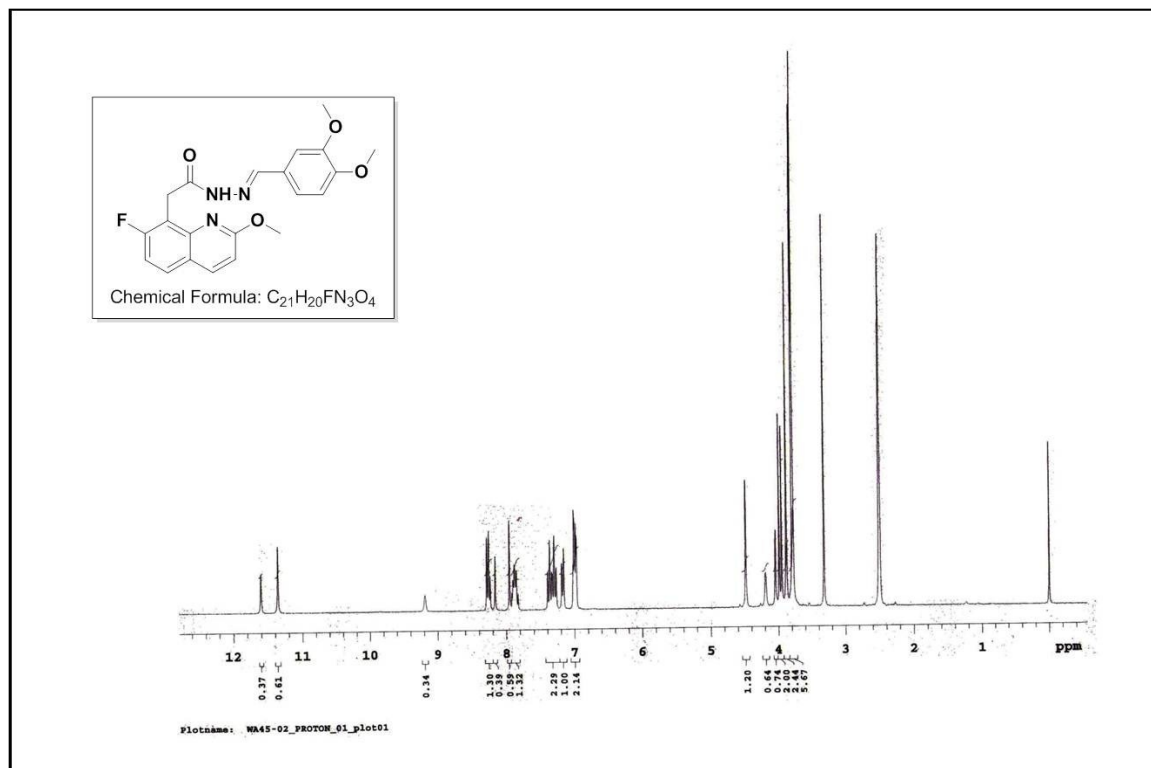

Fig. 13.  $^1H$  NMR spectra of **9e**



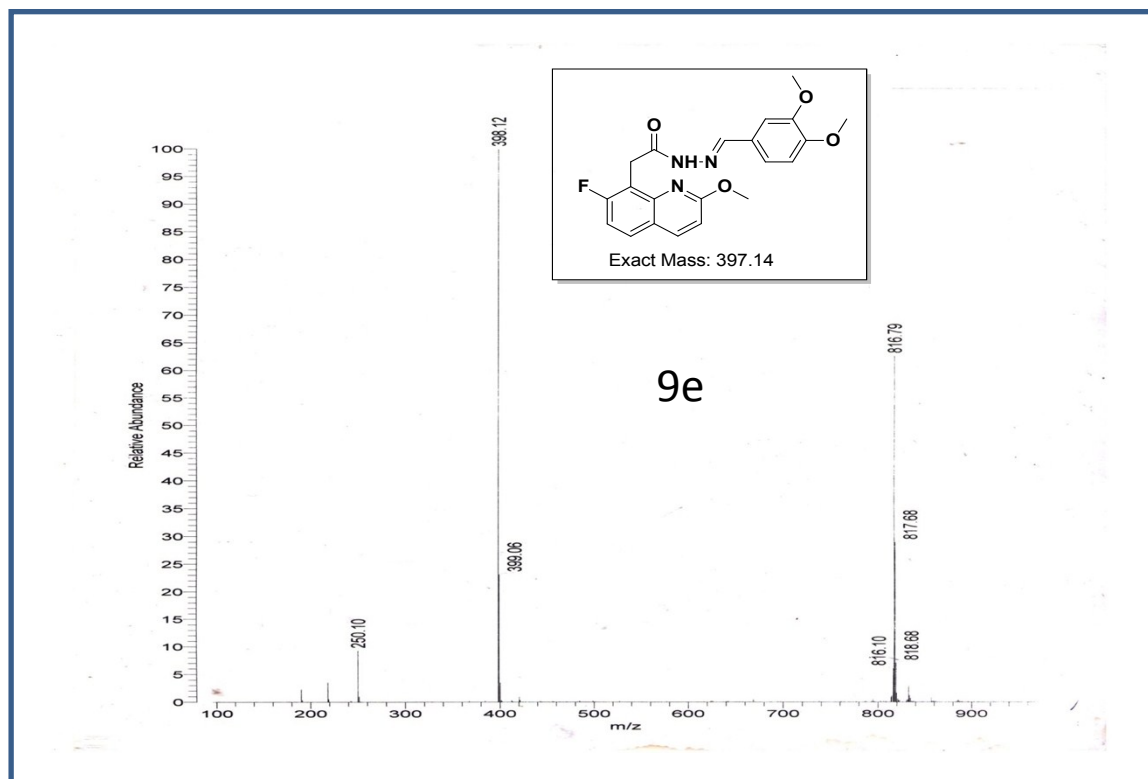

**Fig. 14.** Mass spectra of **9e**

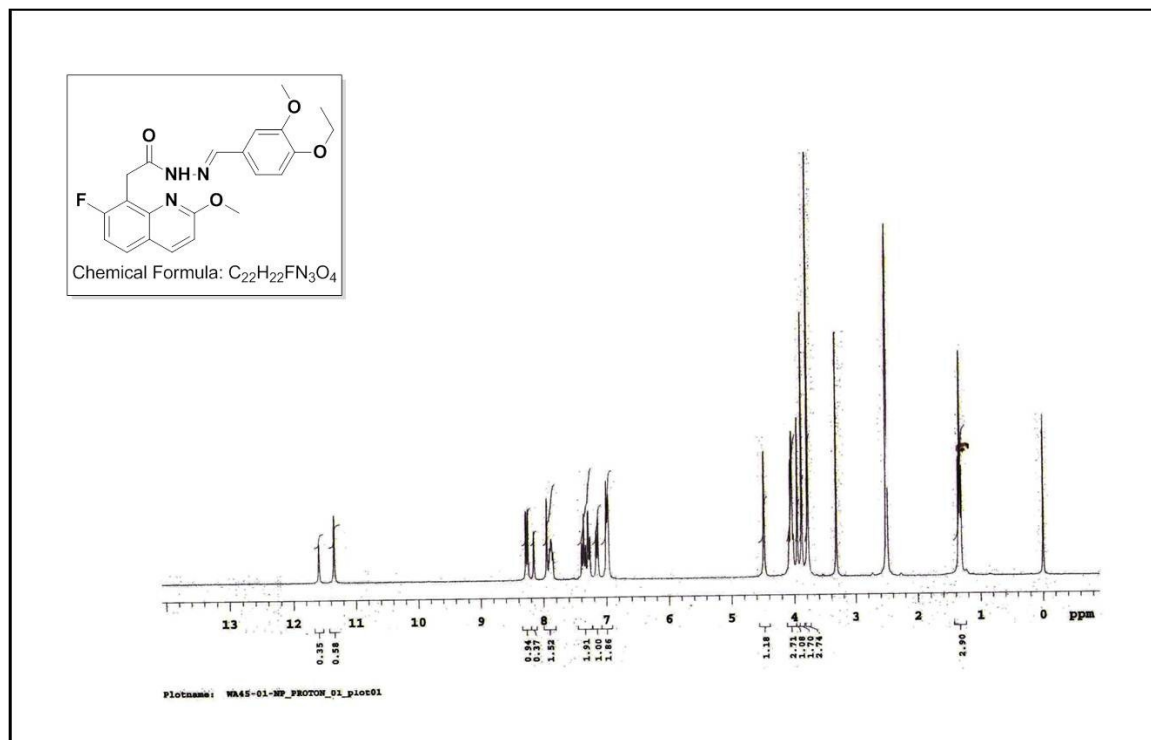

Fig. 15. <sup>1</sup>H NMR spectra of 9f

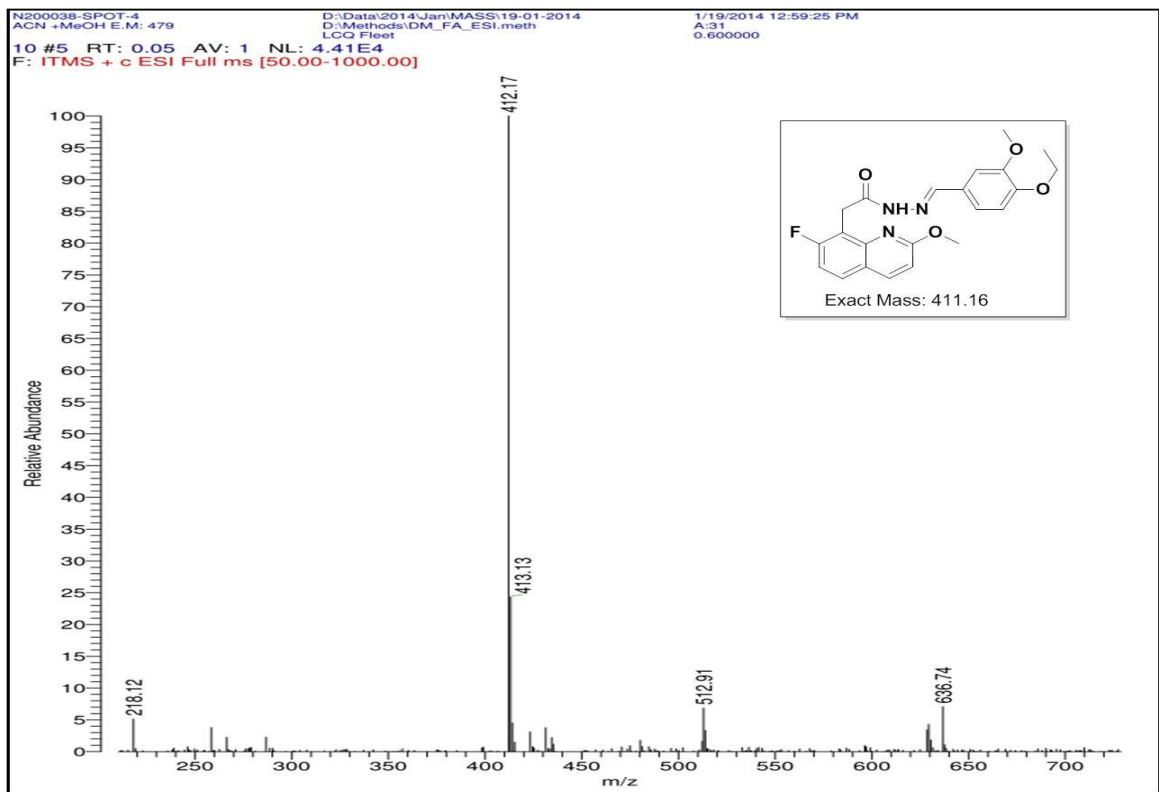

Fig. 16. Mass spectra of 9f

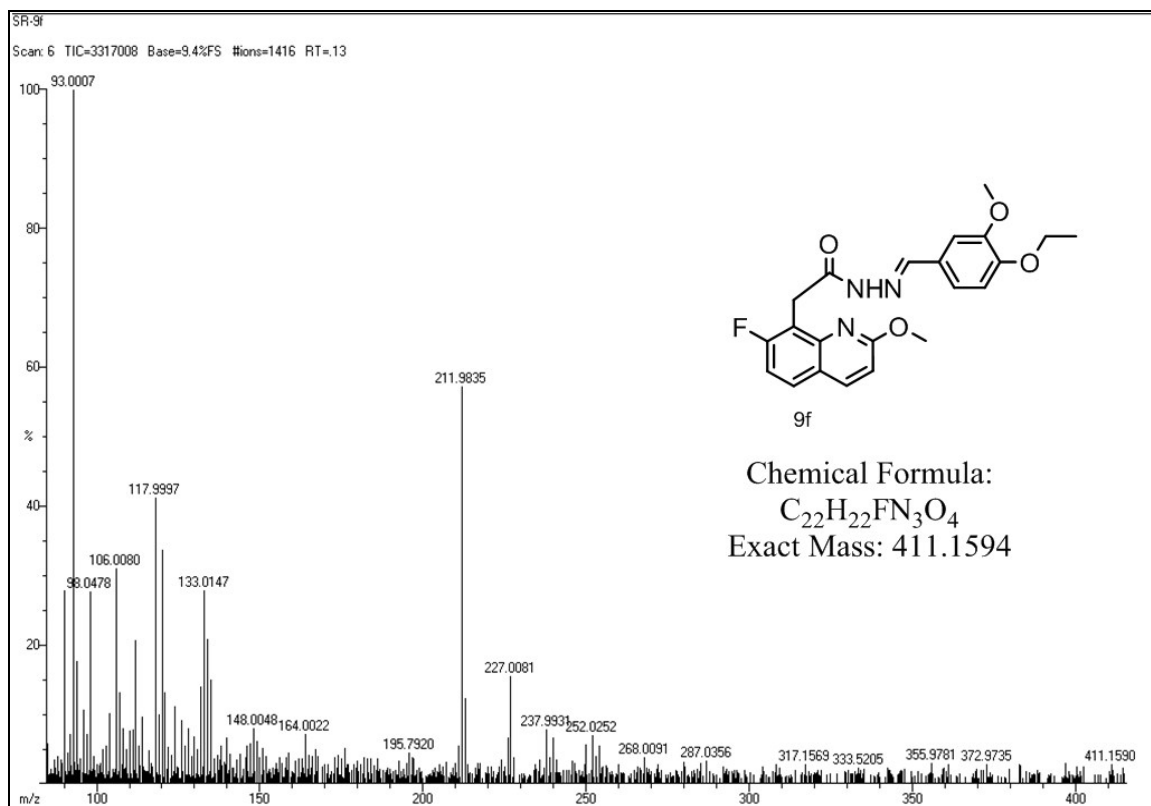

**Fig. 17.** HRMS spectra of **9f**

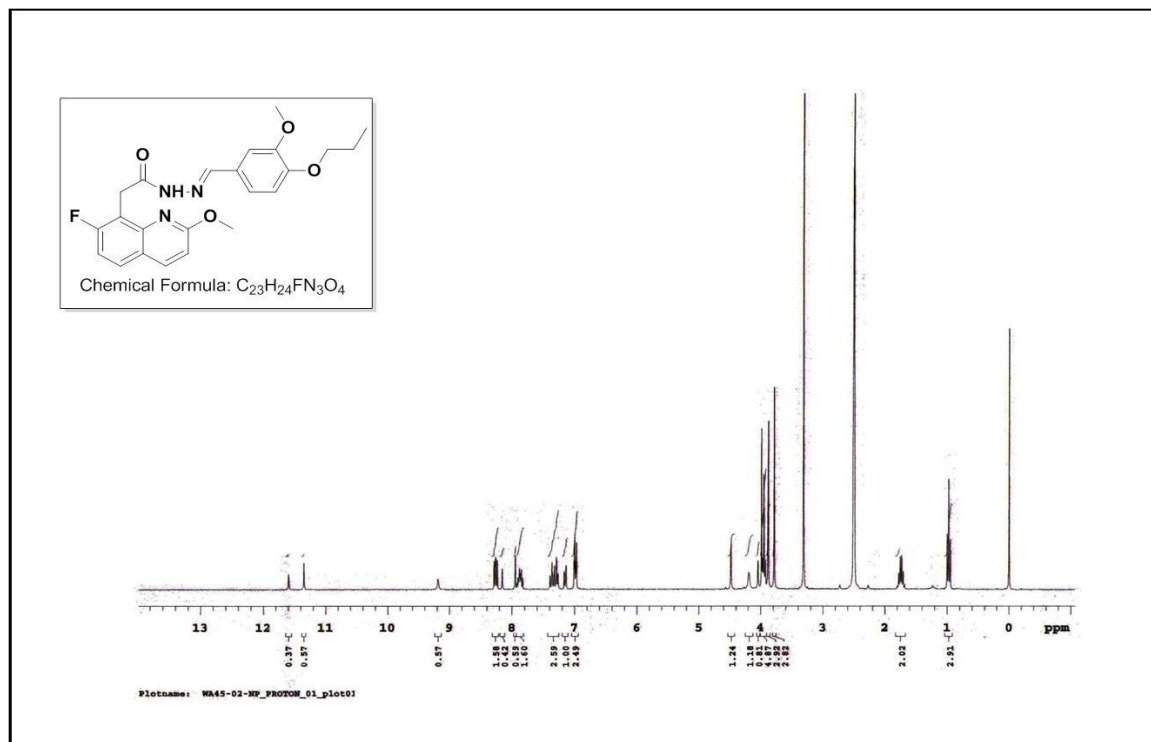

Fig. 18.  $^1H$  NMR spectra of **9g**

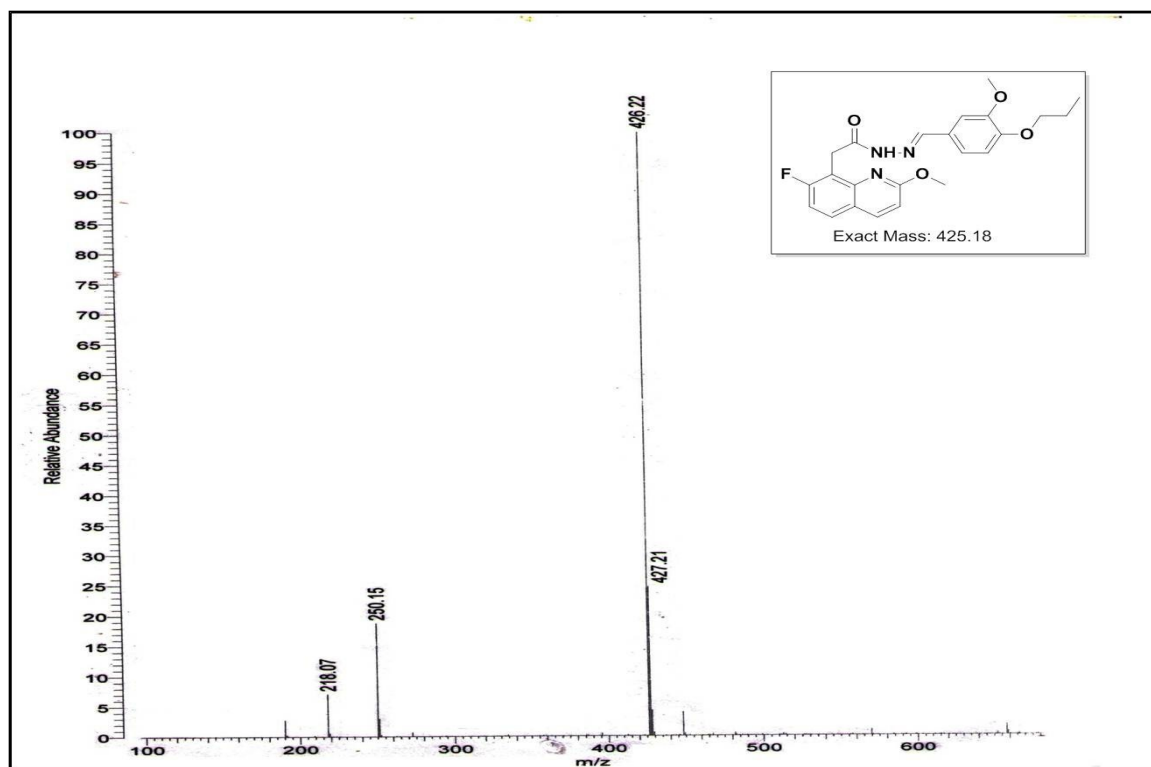

Fig. 19. Mass spectra of 9g

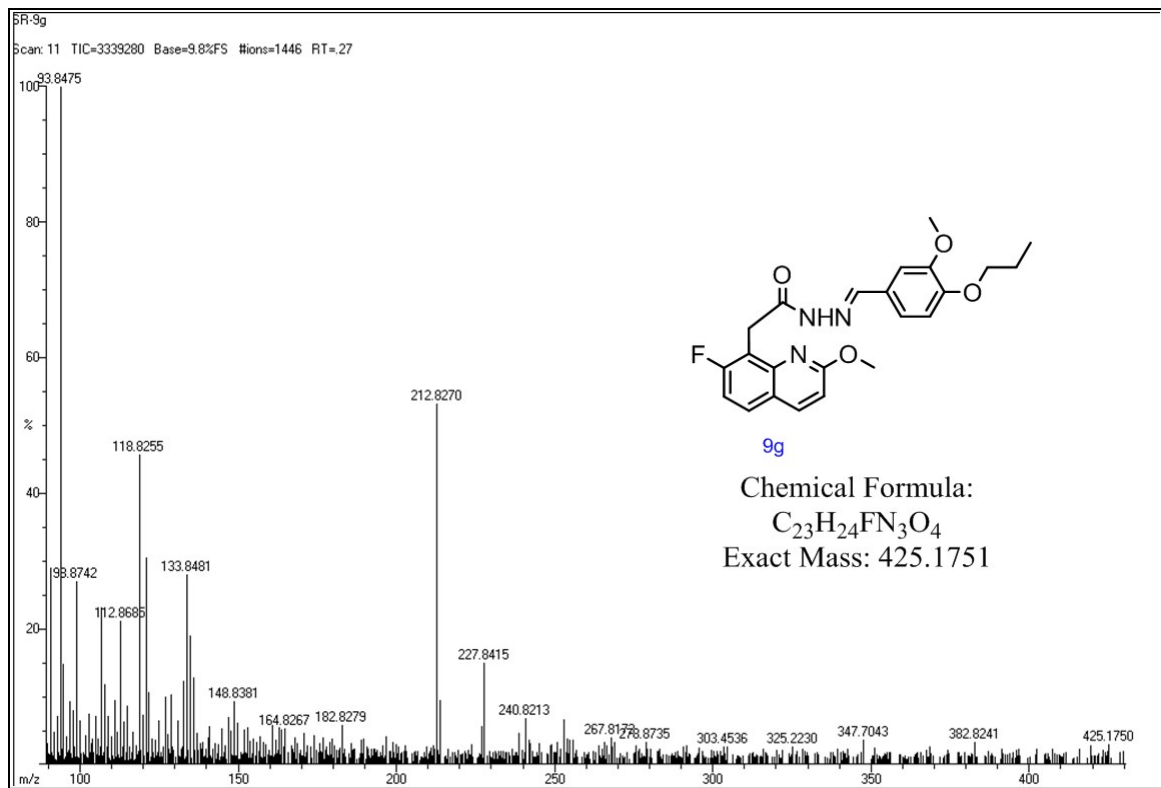

**Fig. 20.** HRMS spectra of **9g**

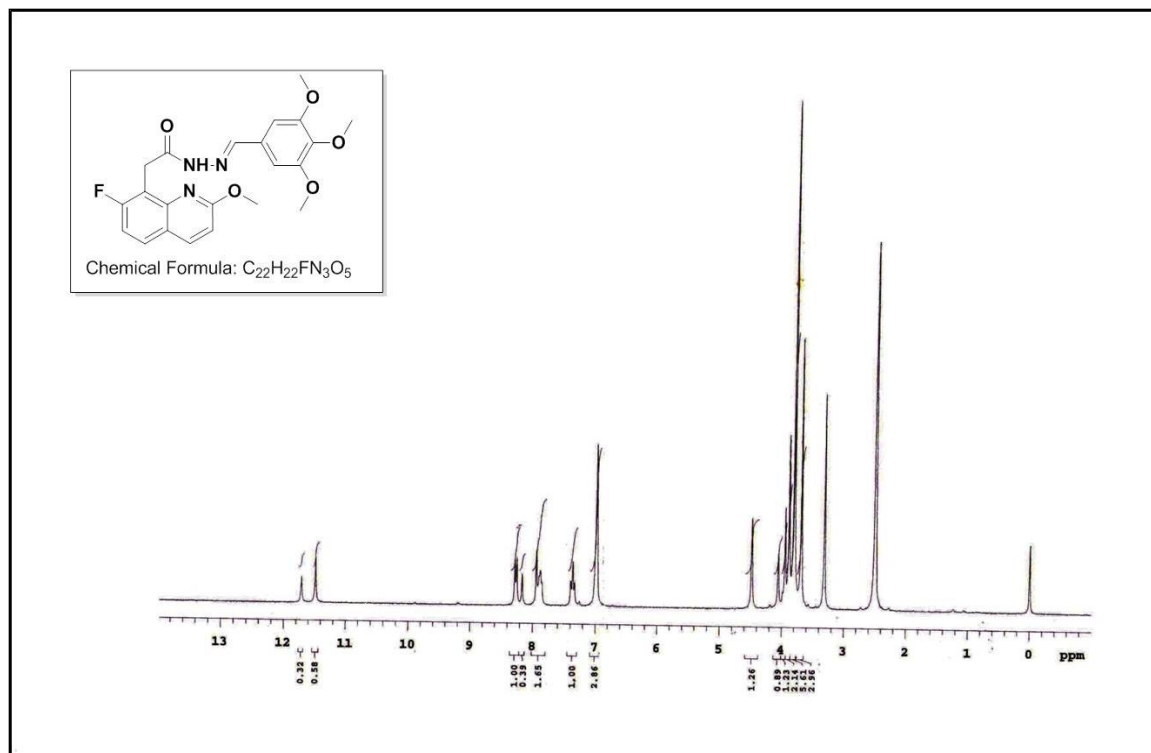

Fig. 21. <sup>1</sup>H NMR spectra of 9h



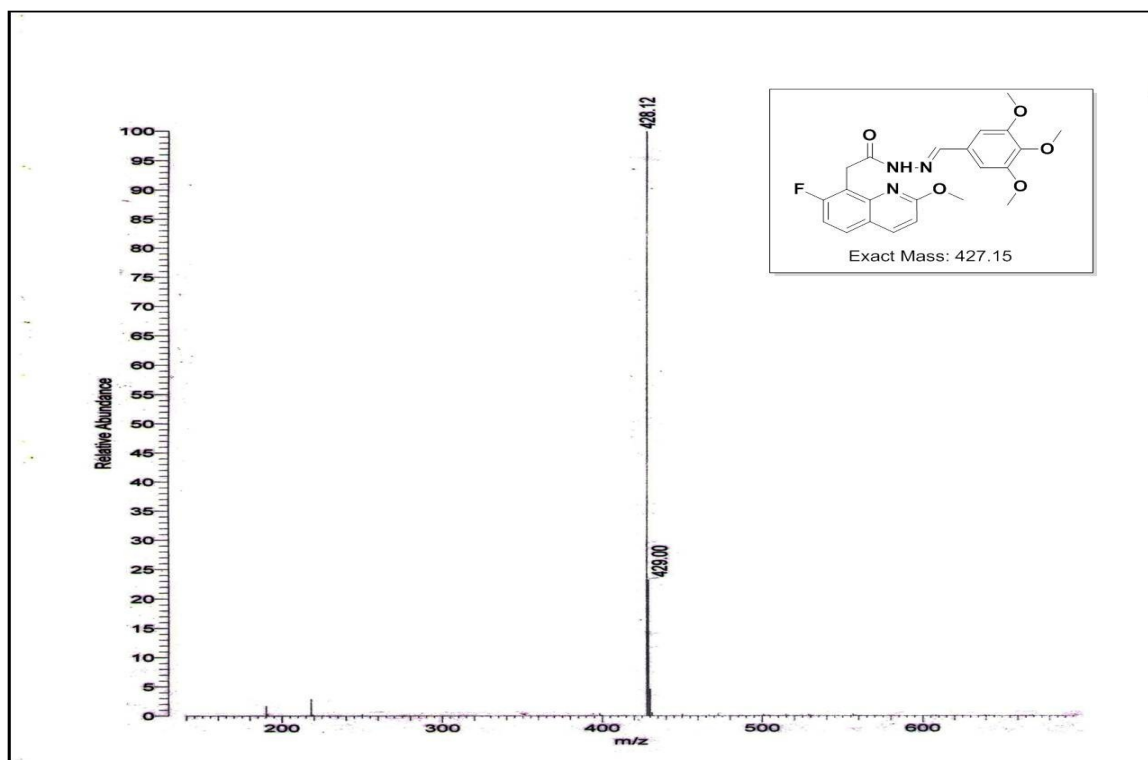

Fig. 22. Mass spectra of 9h

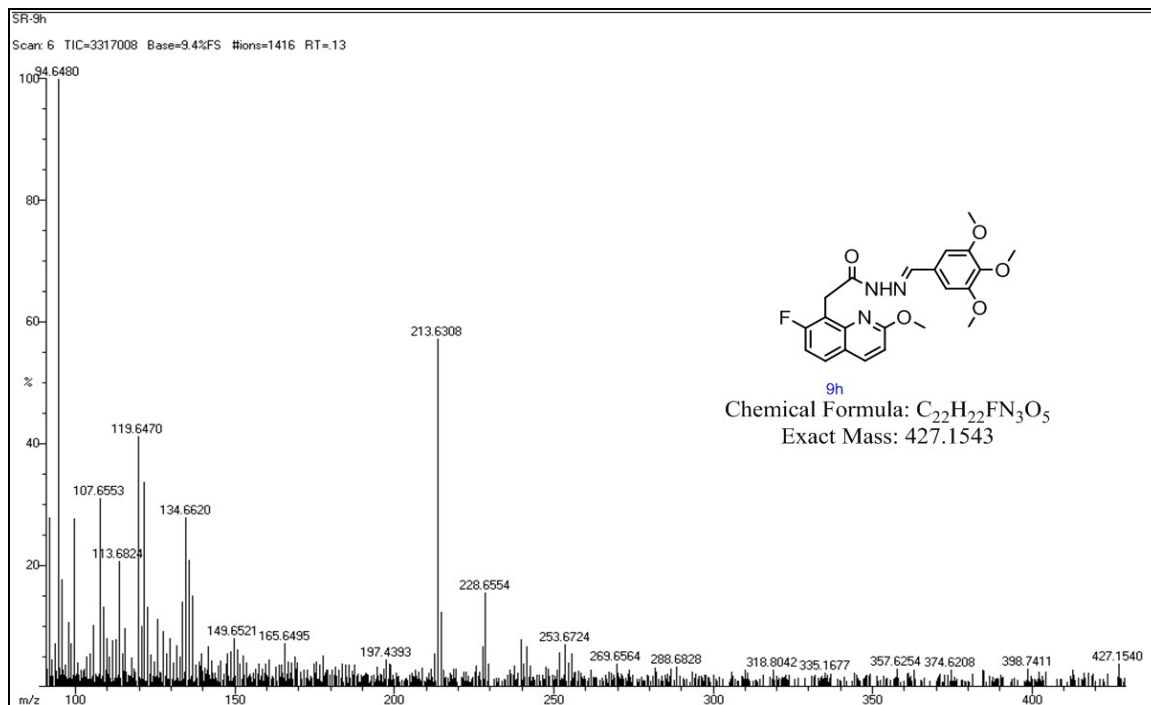

**Fig. 23.** HRMS spectra of **9h**

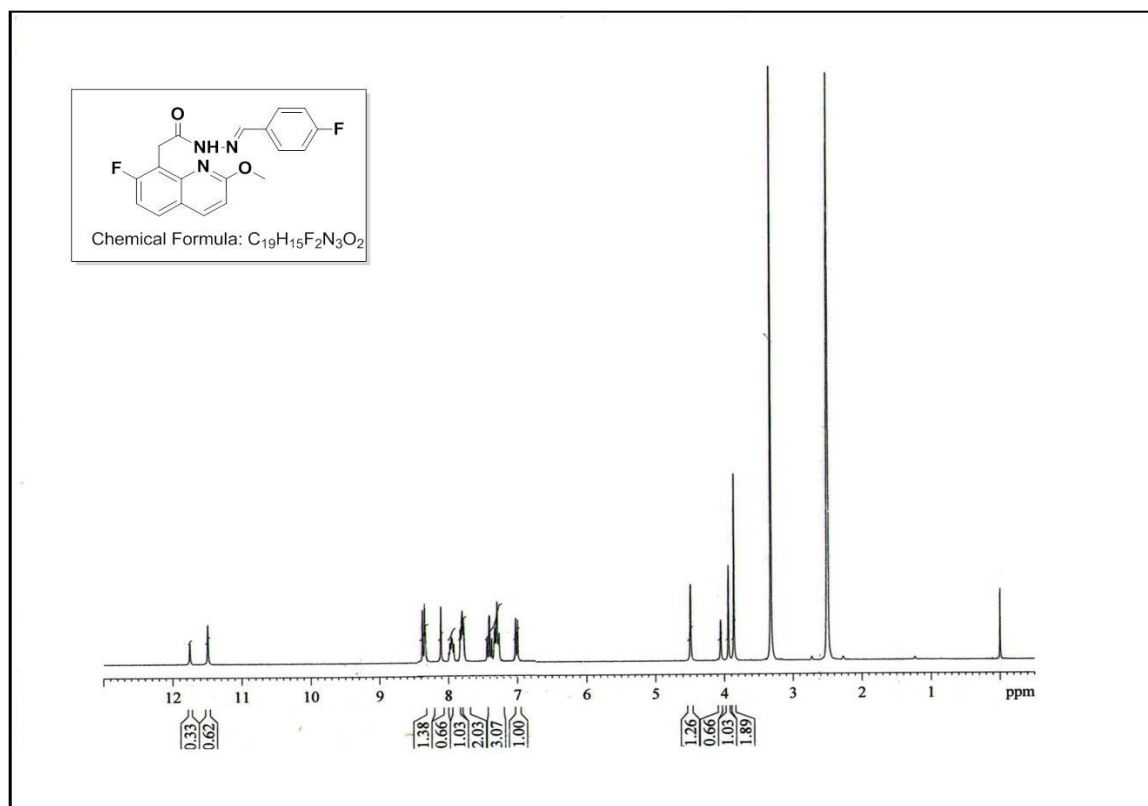

Fig. 24.  $^1H$  NMR spectra of **9i**

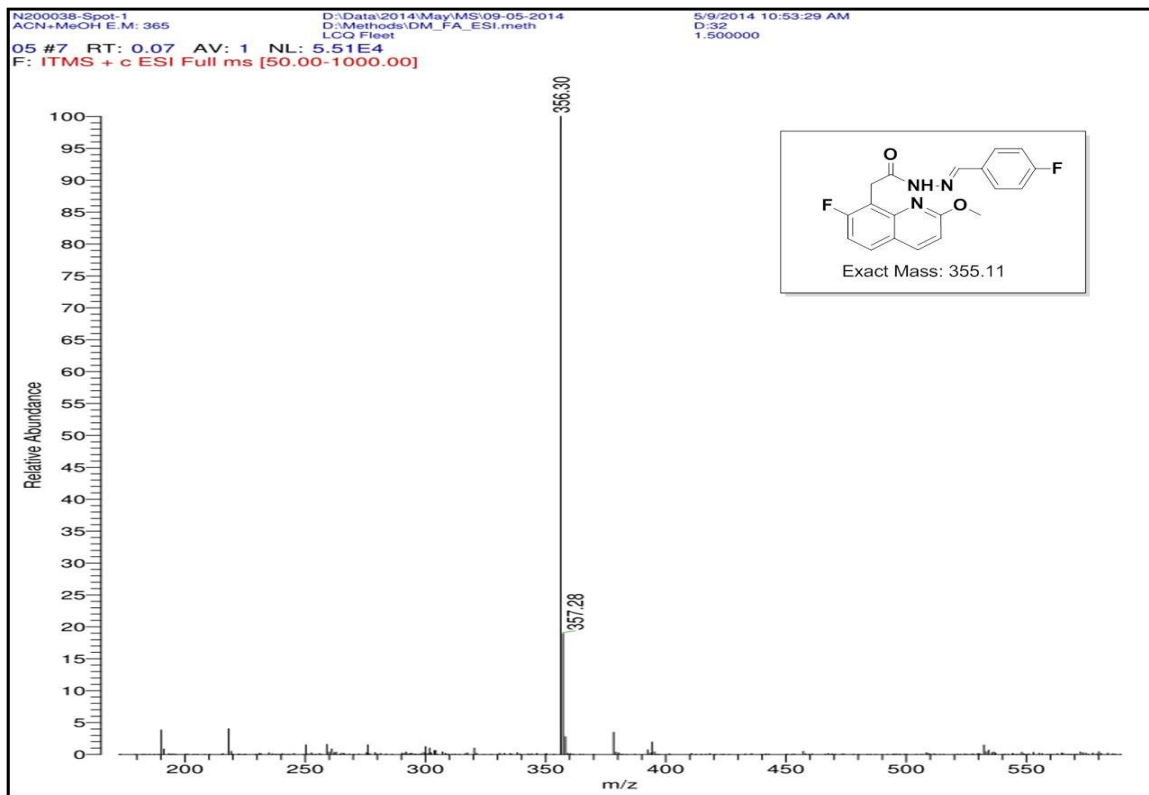

Fig. 25. Mass spectra of 9i

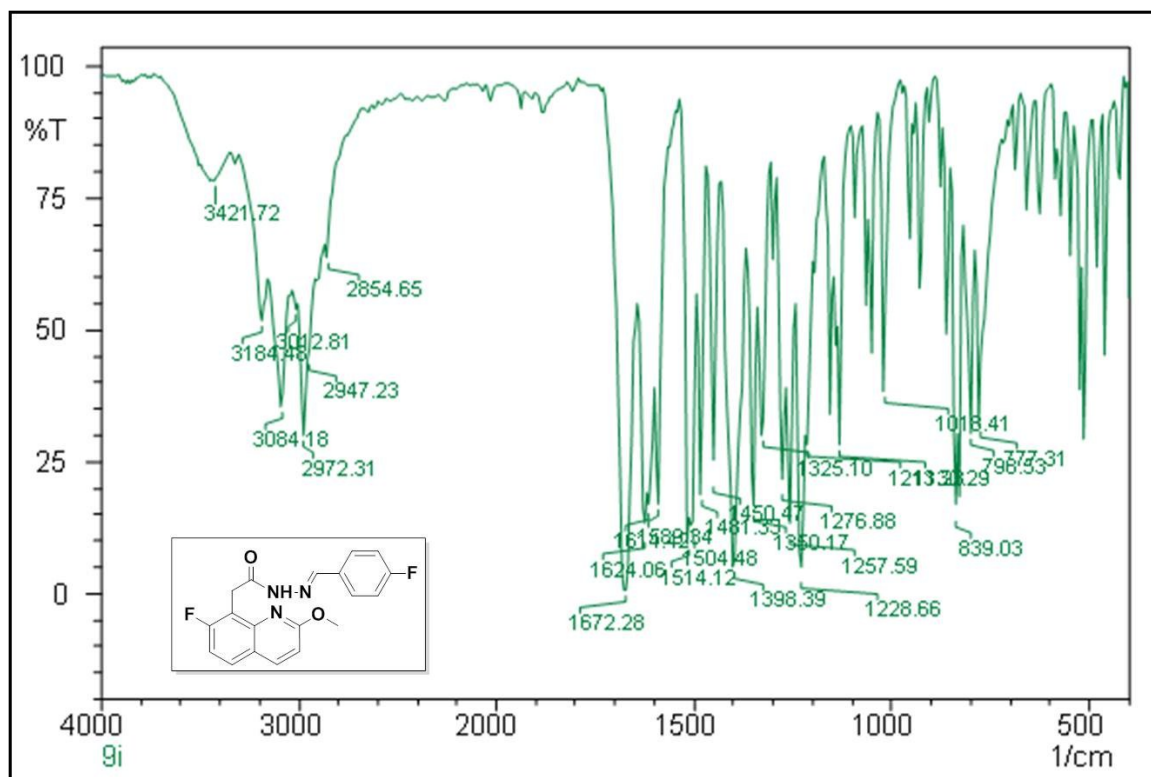

Fig. 26. IR spectra of 9i

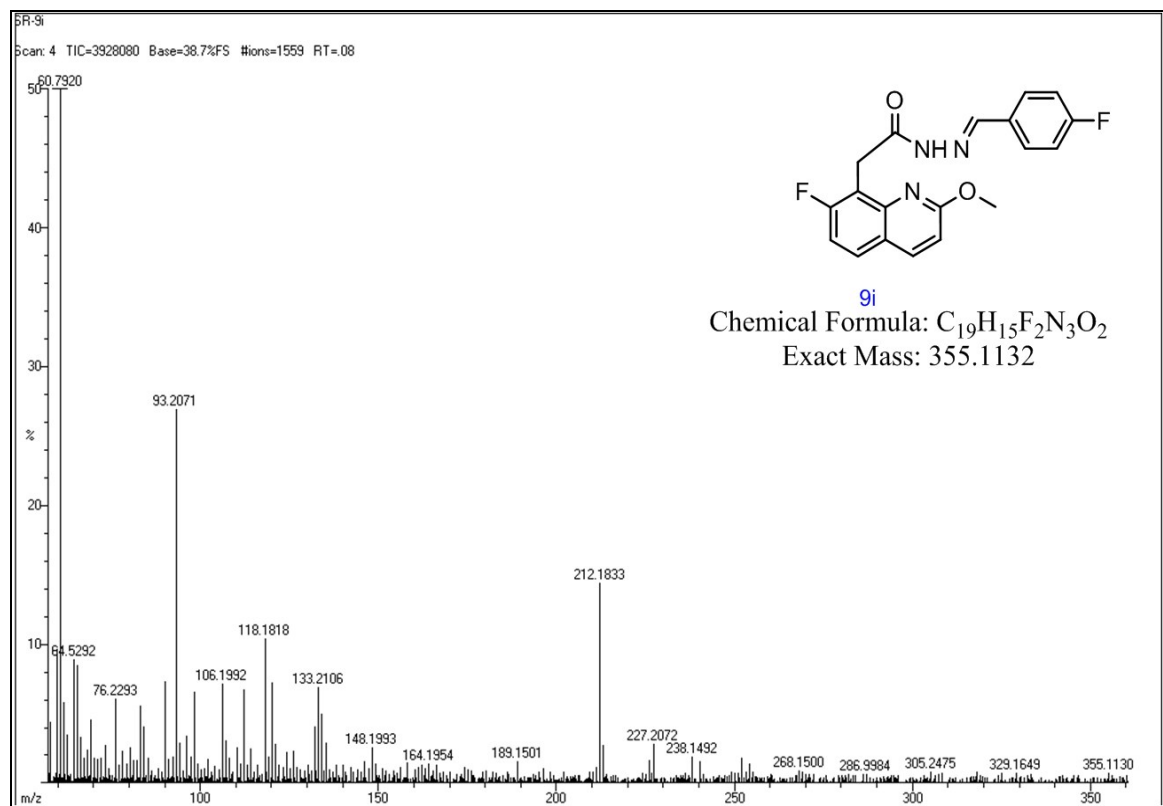

Fig. 27. HRMS spectra of **9i**

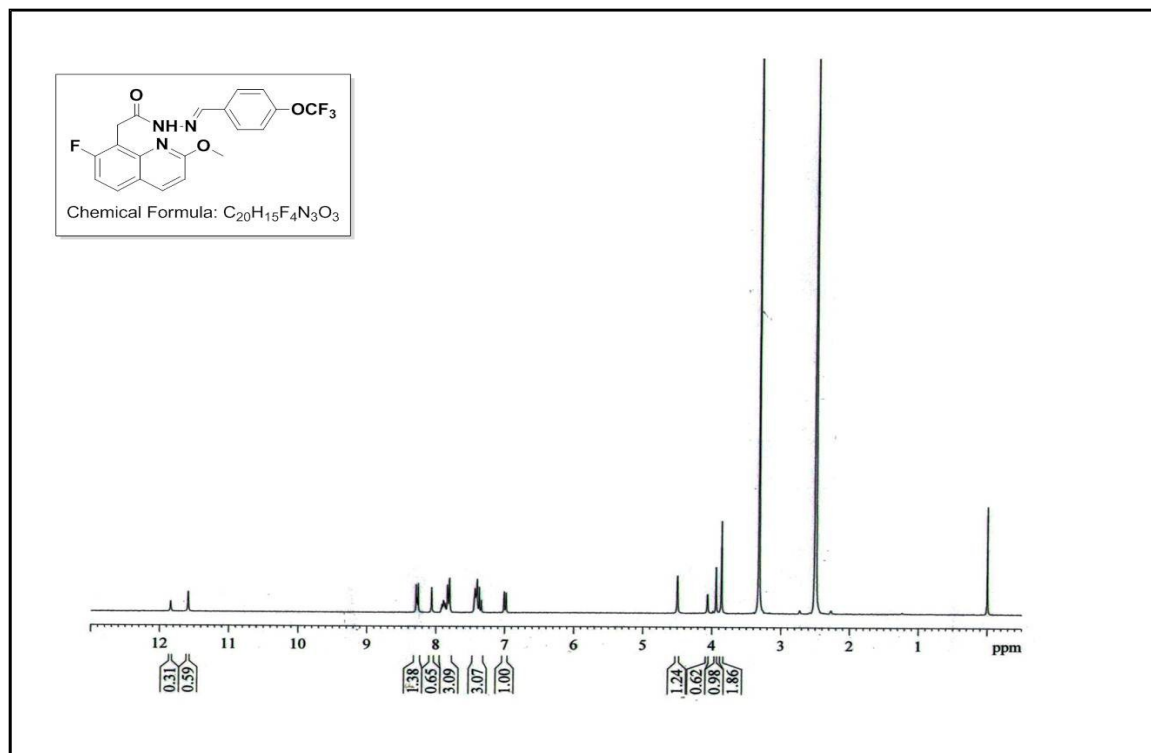

**Fig. 28.**  $^1H$  NMR spectra of **9j**

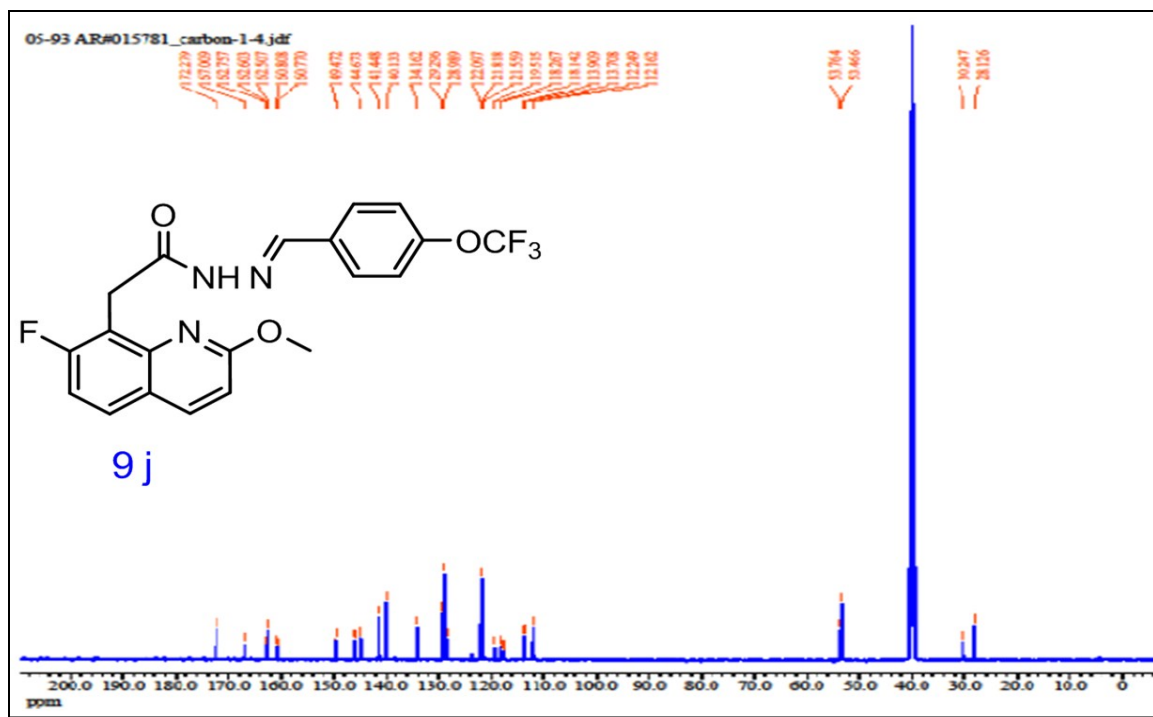

Fig. 29.  $^{13}\text{C}$  NMR spectra of 9j



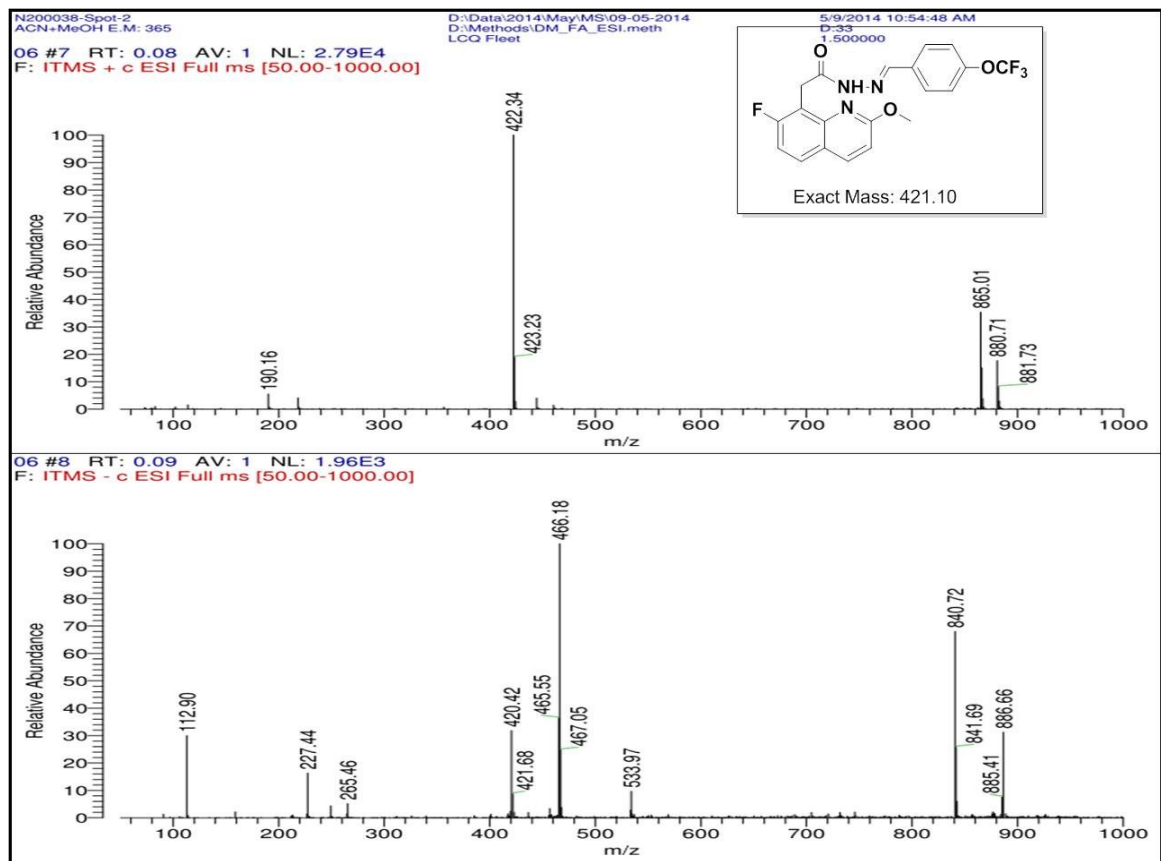

Fig. 30. Mass spectra of 9j

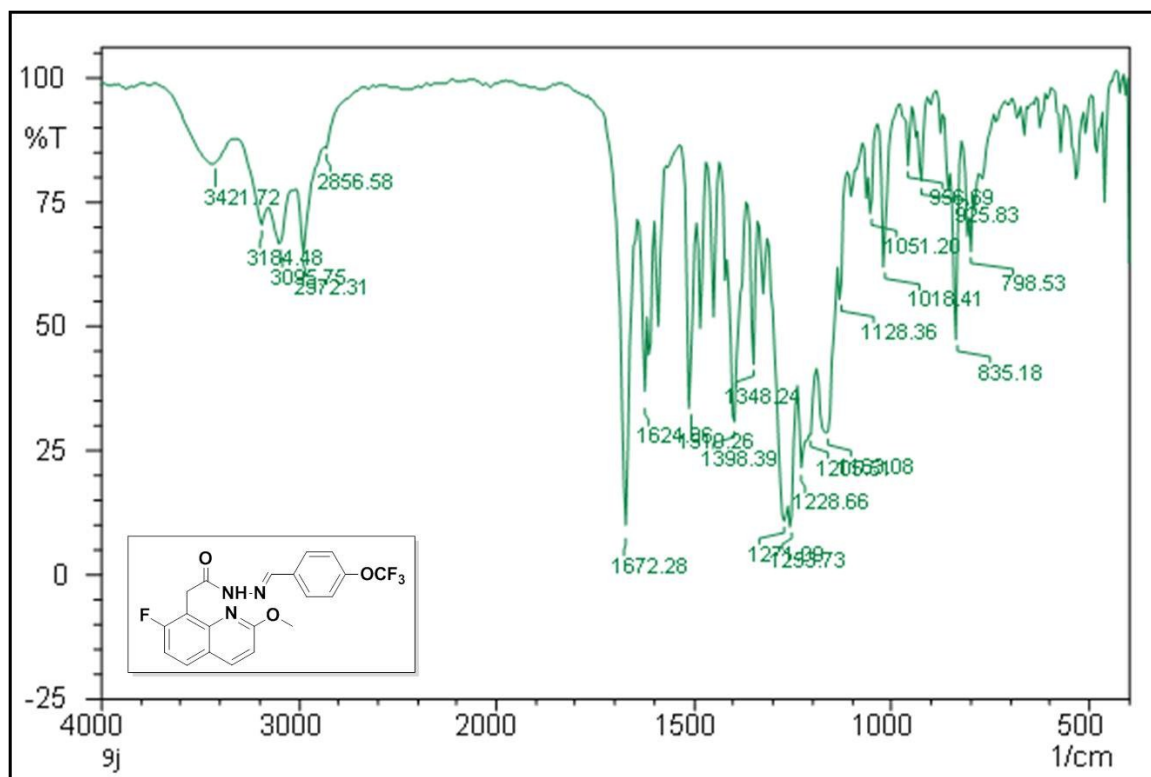

**Fig. 31.** IR spectra of 9j

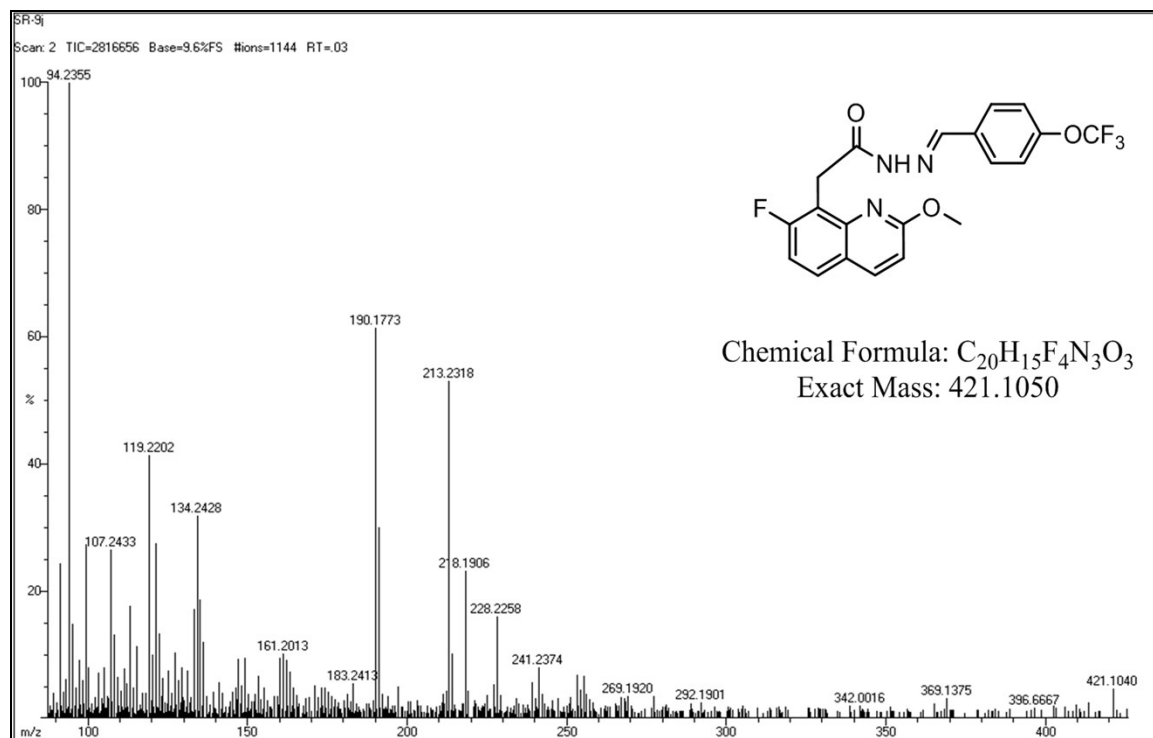

**Fig. 32.** HRMS spectra of 9j

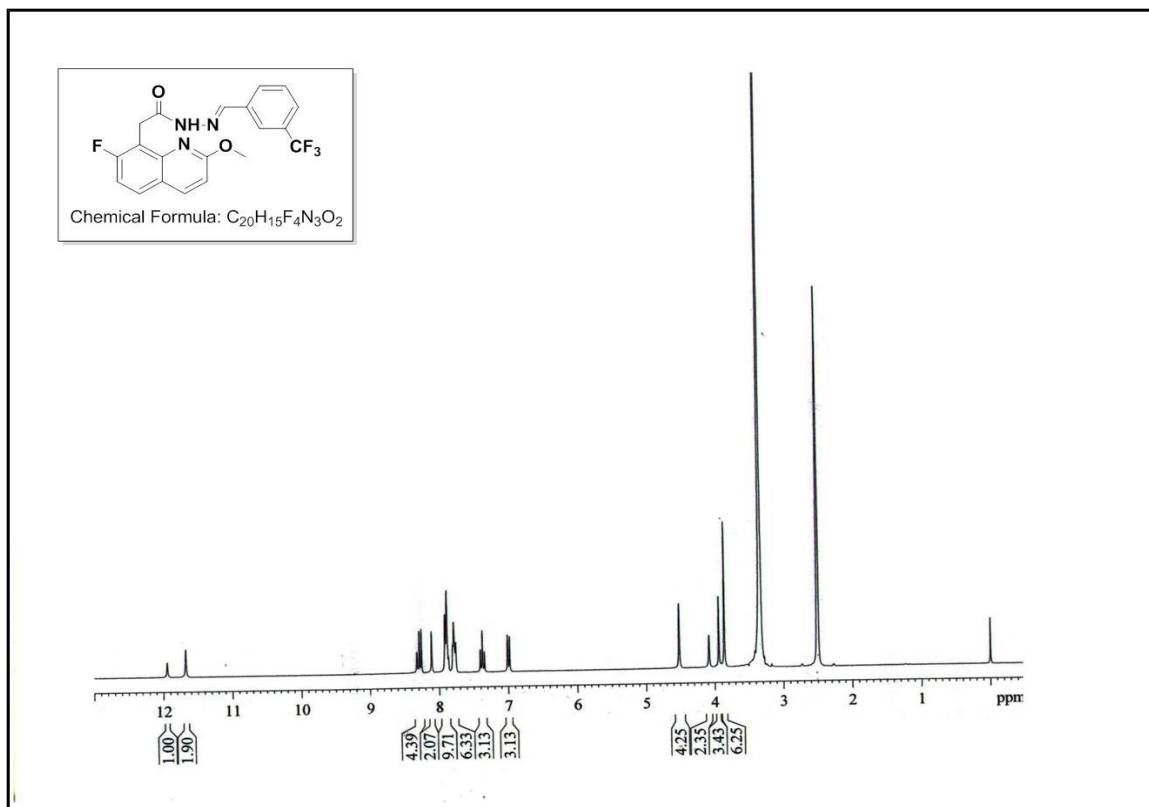

Fig. 33.  $^1H$  NMR spectra of **9k**

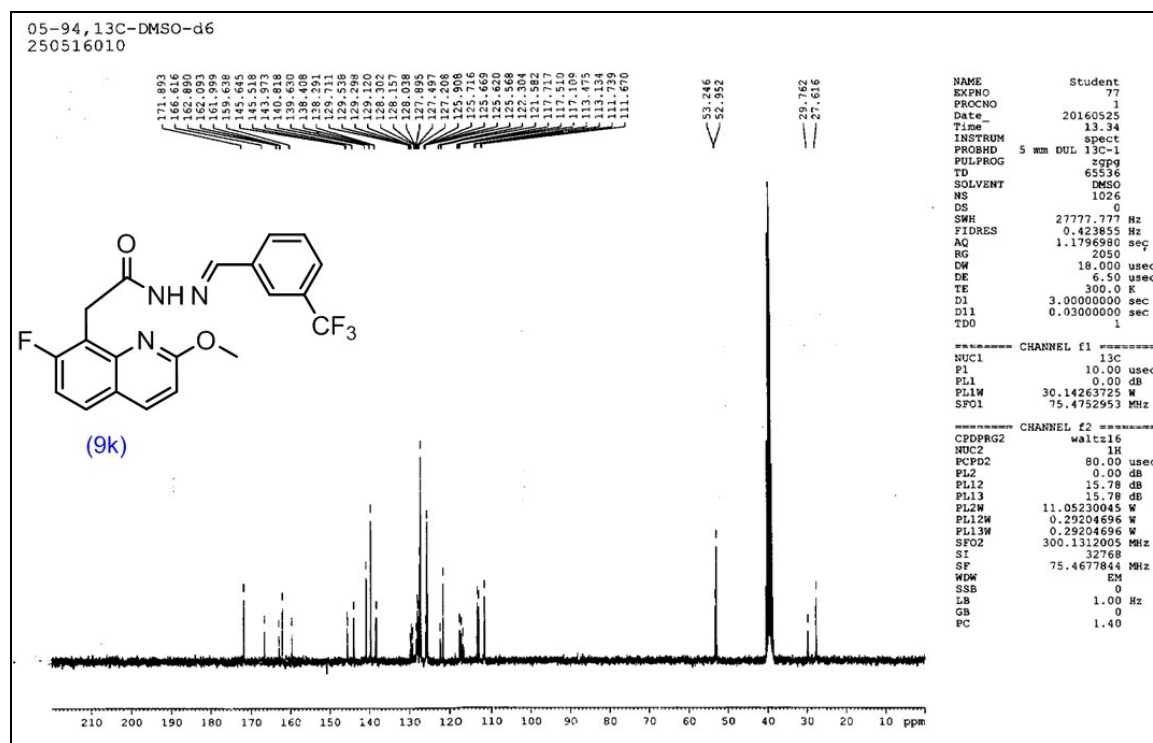

Fig. 34. <sup>13</sup>C NMR spectra of **9k**

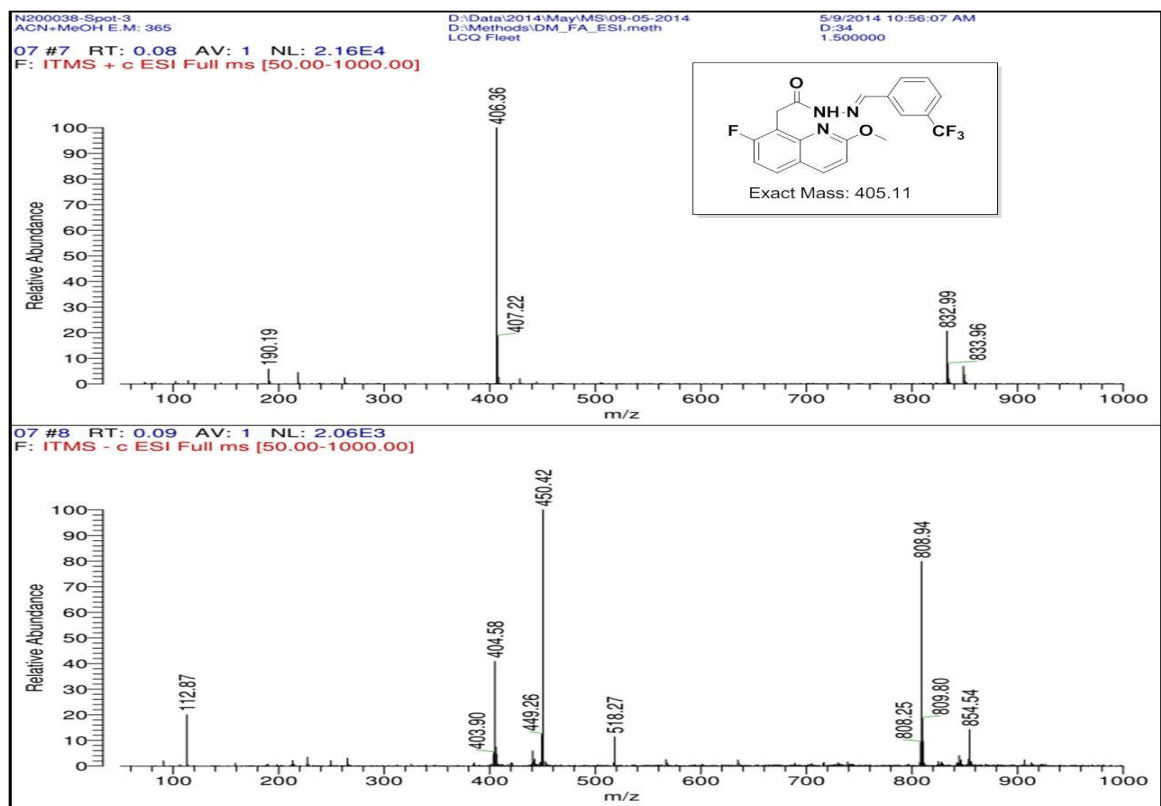

Fig. 35. Mass spectra of 9k

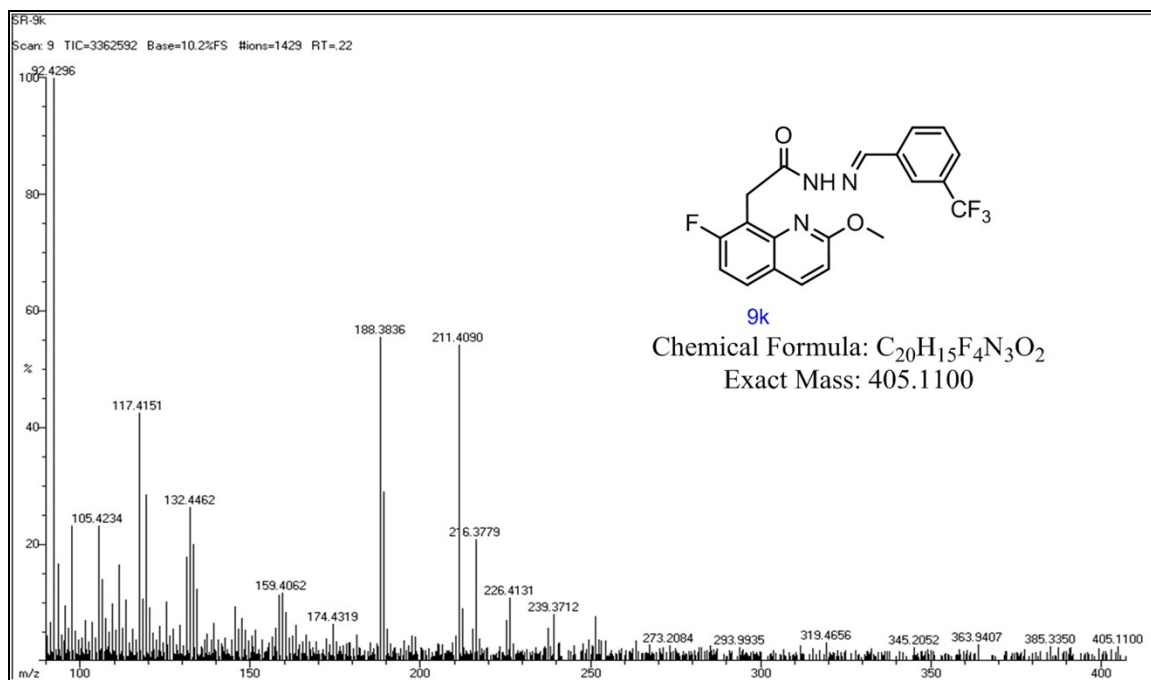

Fig. 36. HRMS spectra of **9k**

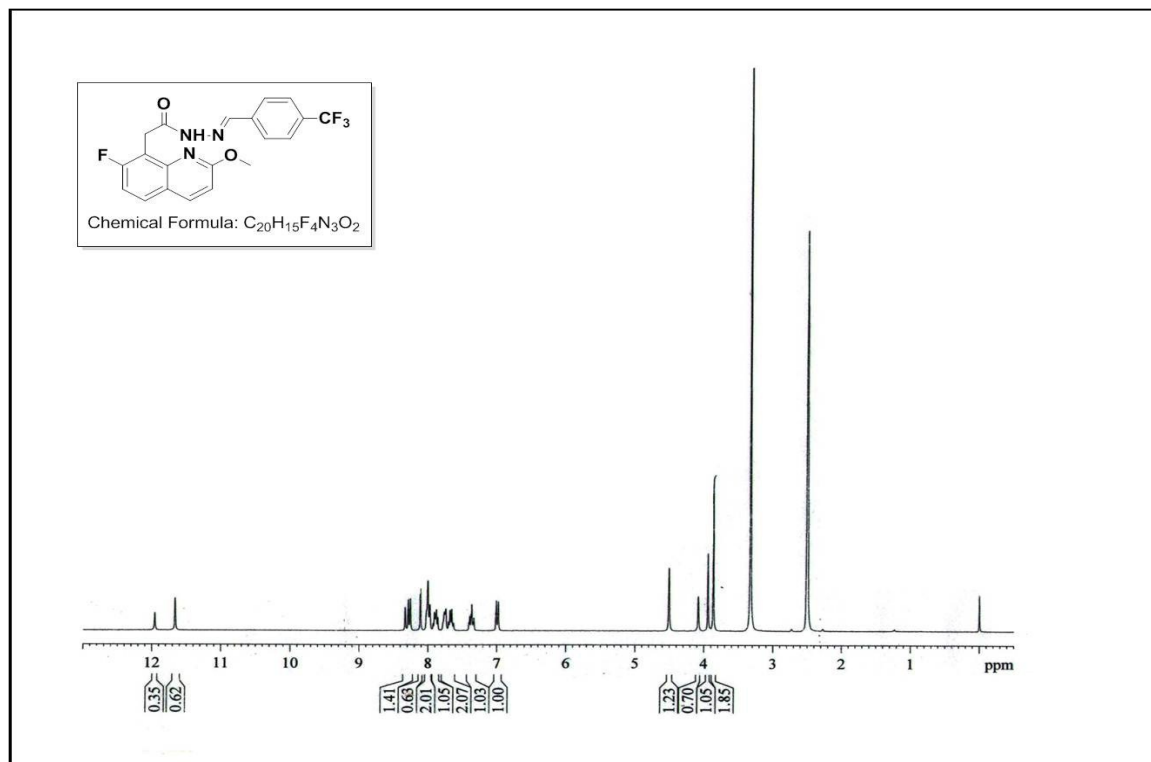

Fig. 37.  $^1H$  NMR spectra of **91**



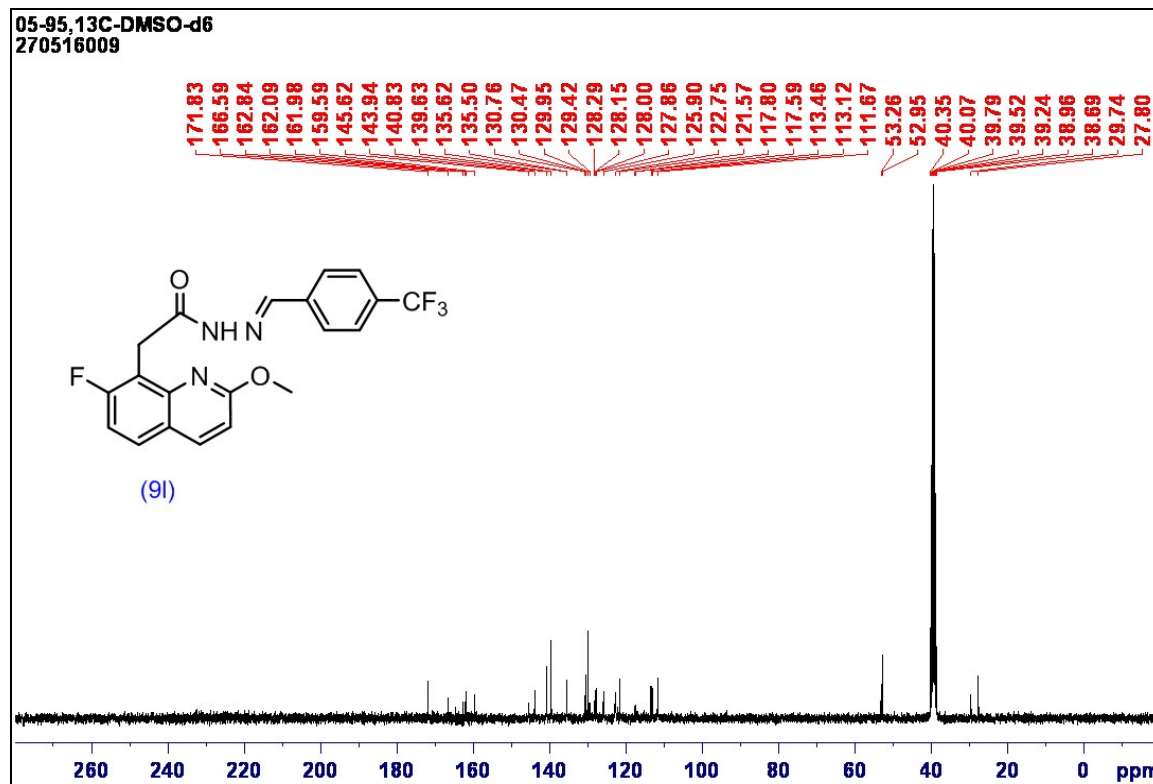

Fig. 38. <sup>13</sup>C NMR spectra of 9l

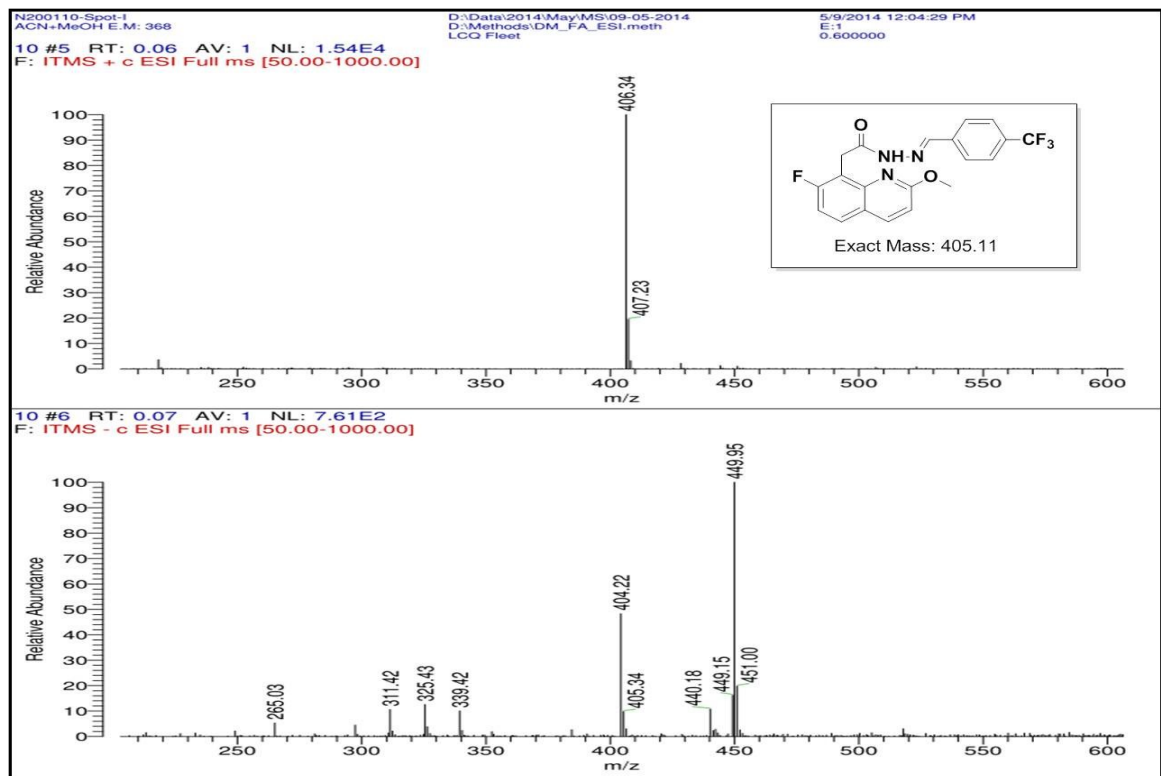

Fig. 39. Mass spectra of 91

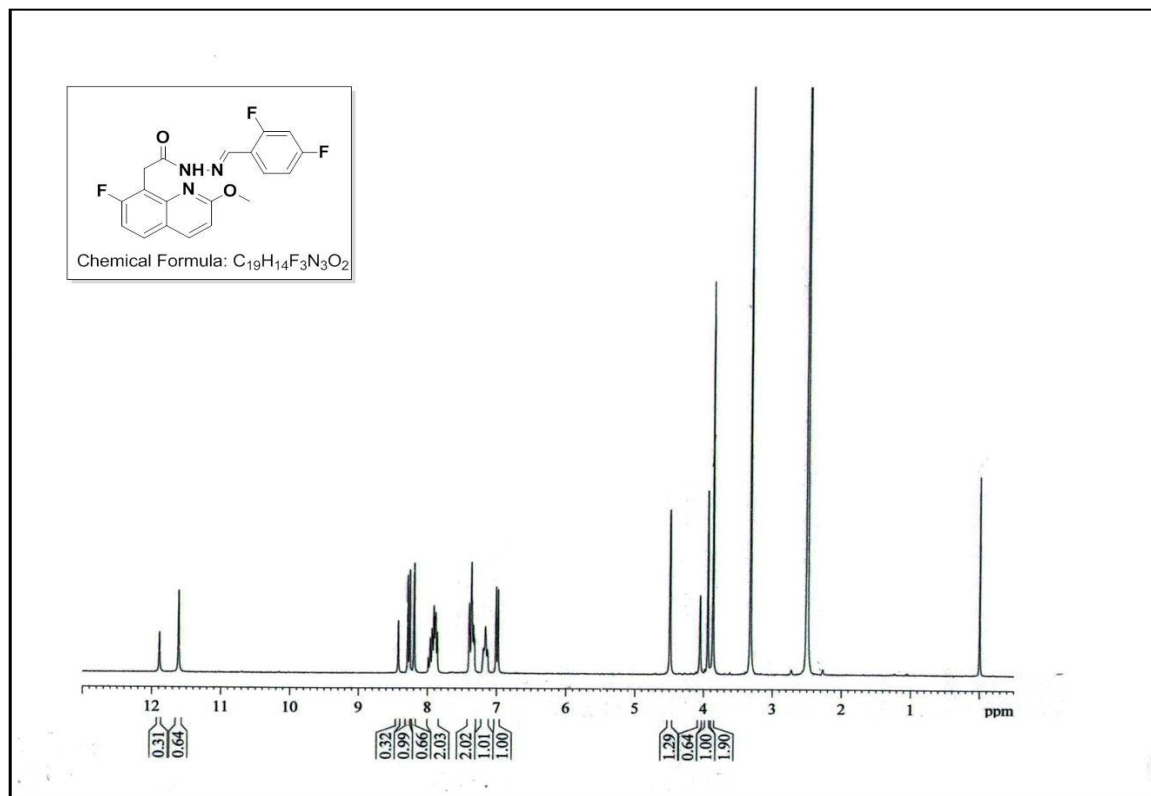

**Fig. 40.**  $^1H$  NMR spectra of **9m**

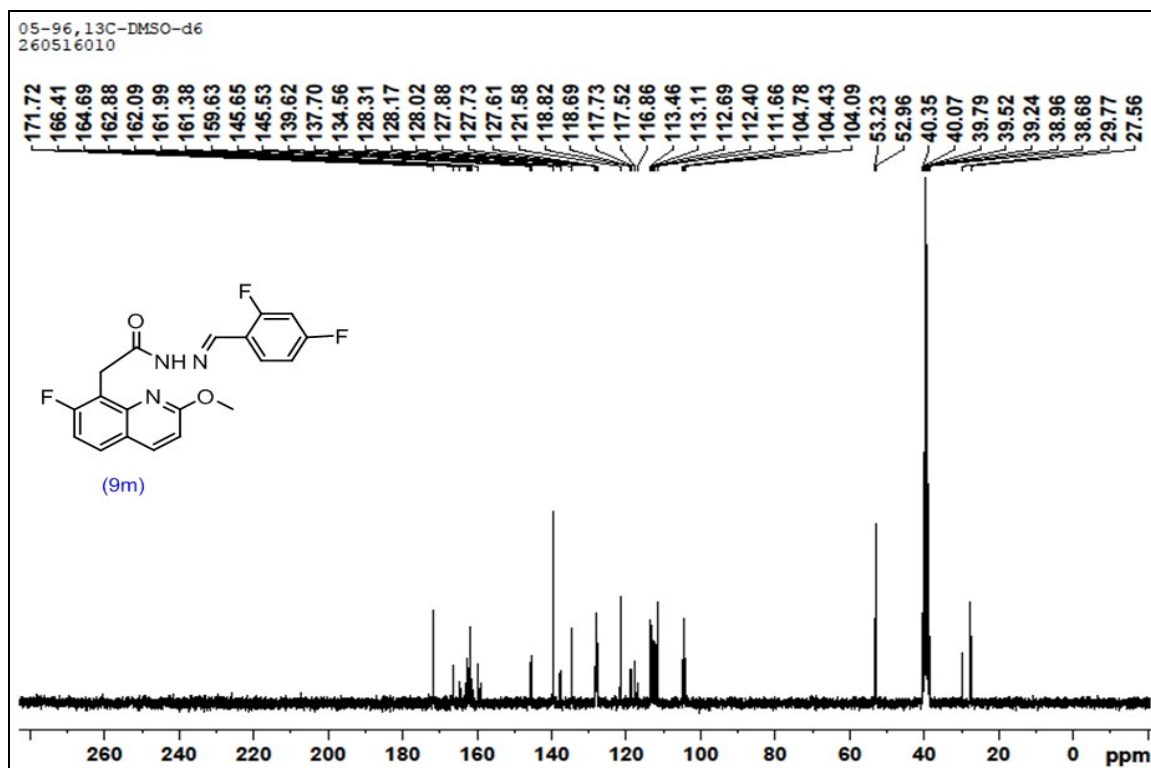

Fig.41.  $^{13}\text{C}$  NMR spectra of 9m

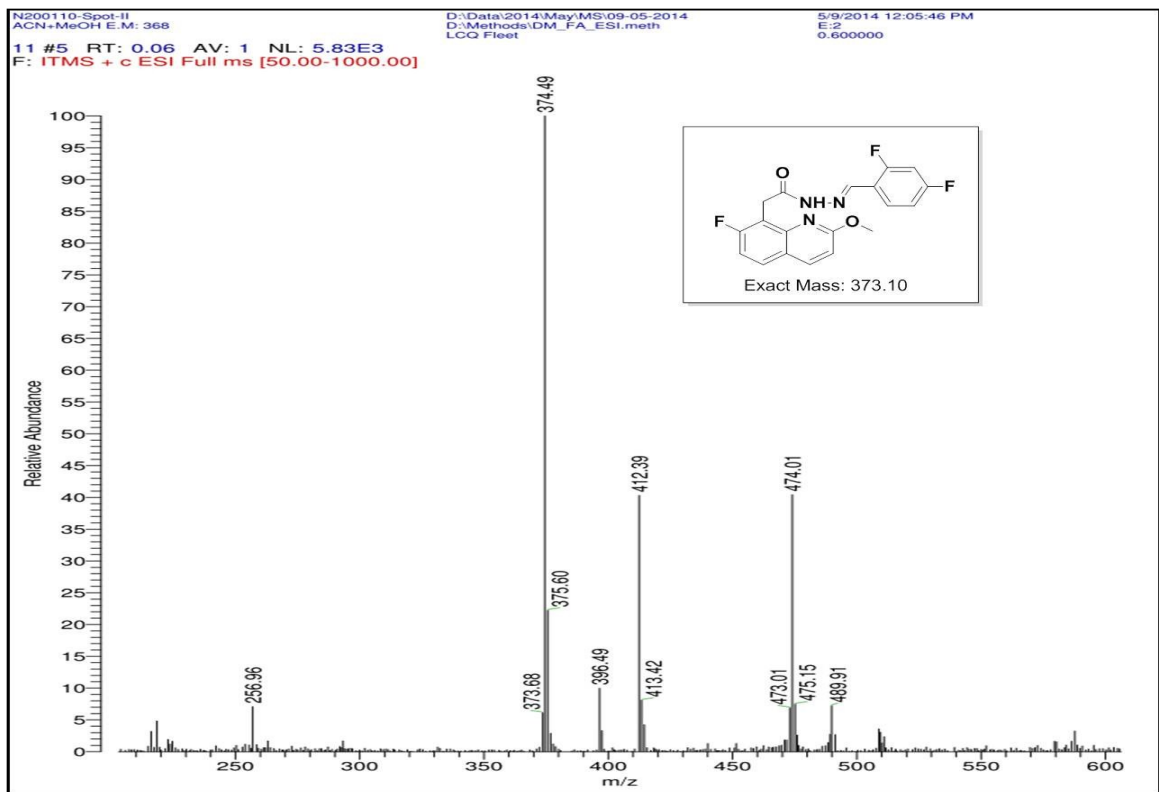

Fig. 42. Mass spectrum of 9m

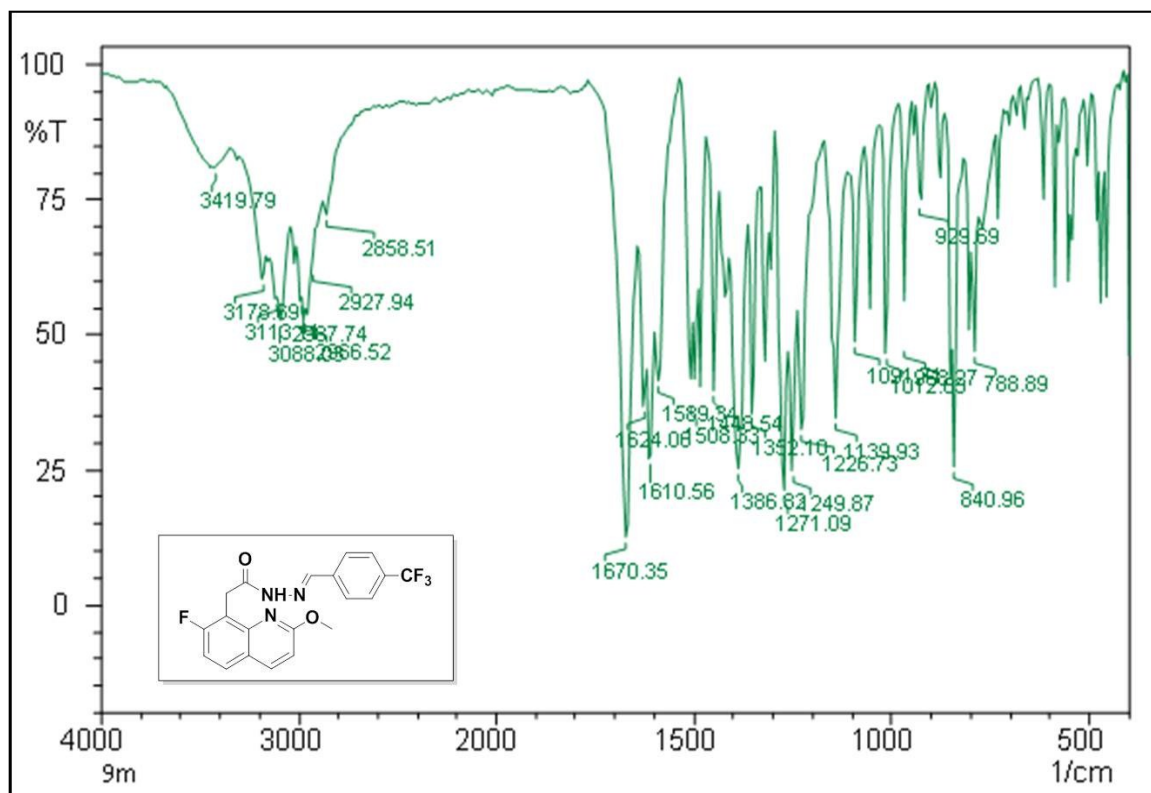

Fig. 43. IR spectra of 9m

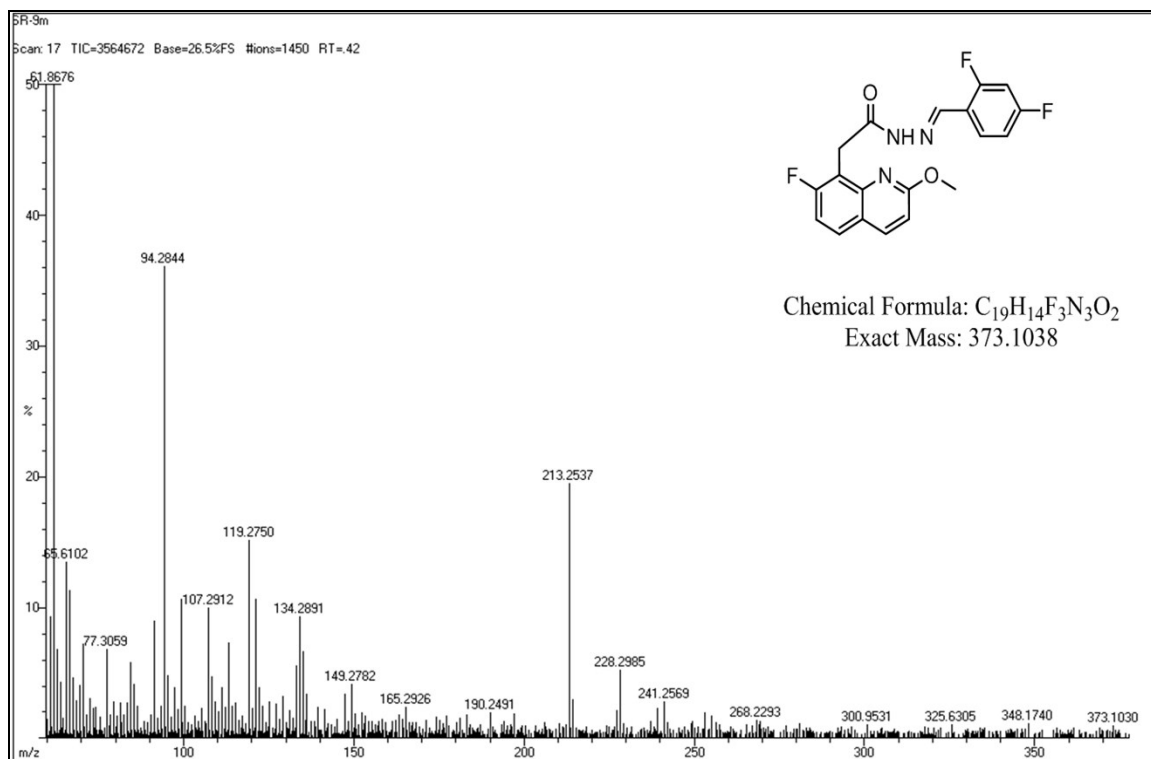

Fig.44. HRMS spectra of 9m

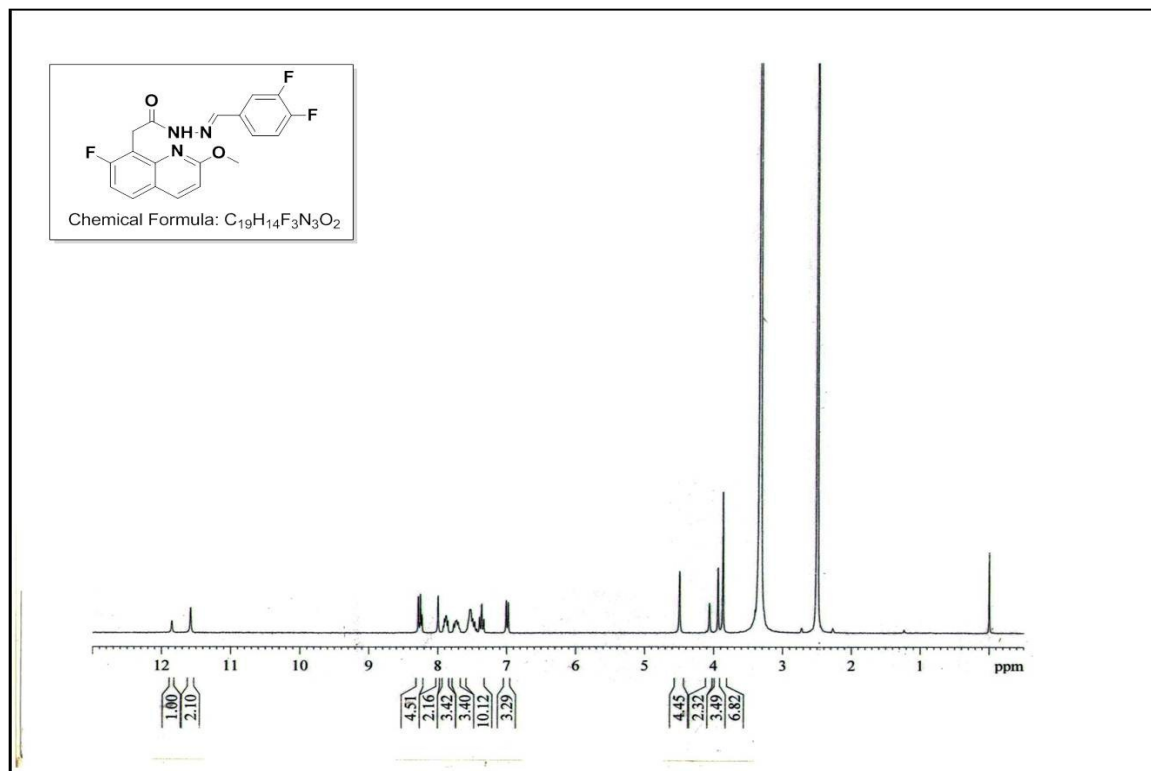

Fig. 45.  $^1H$  NMR spectra of **9n**



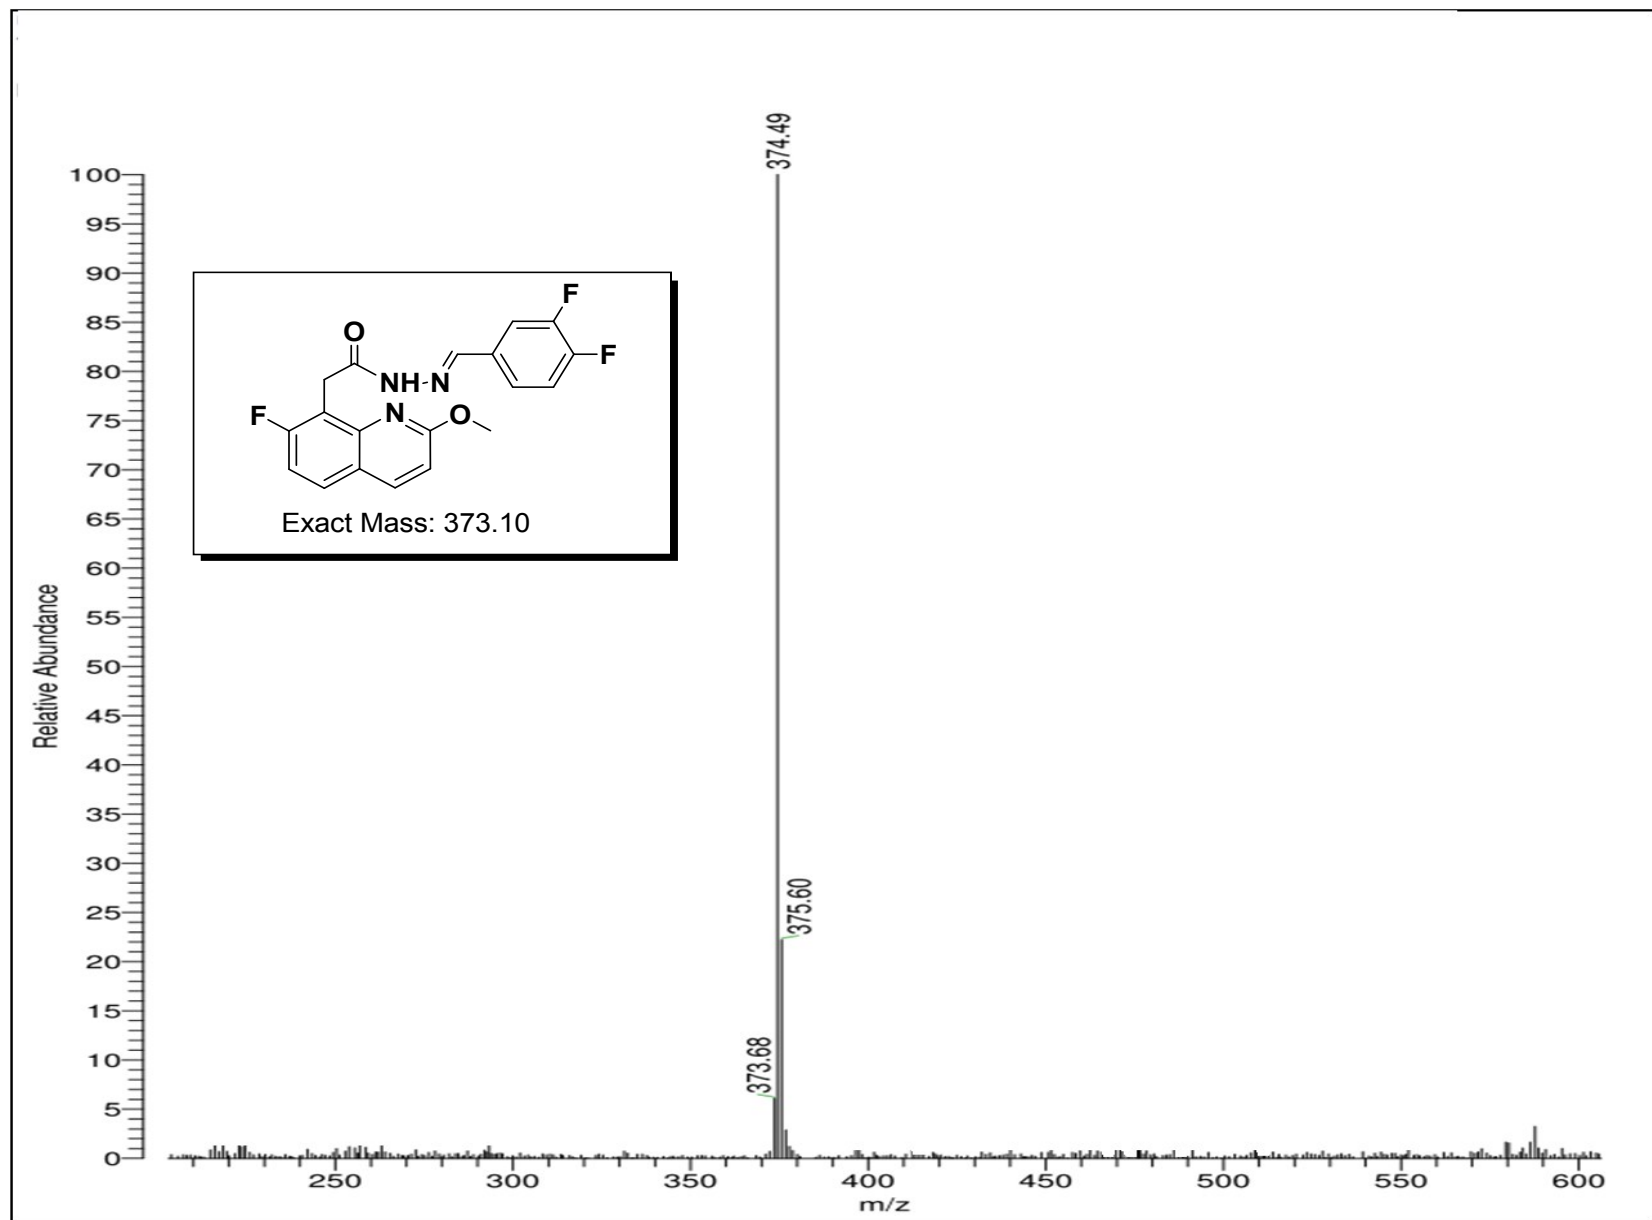

Fig. 46. Mass spectrum of **9n**

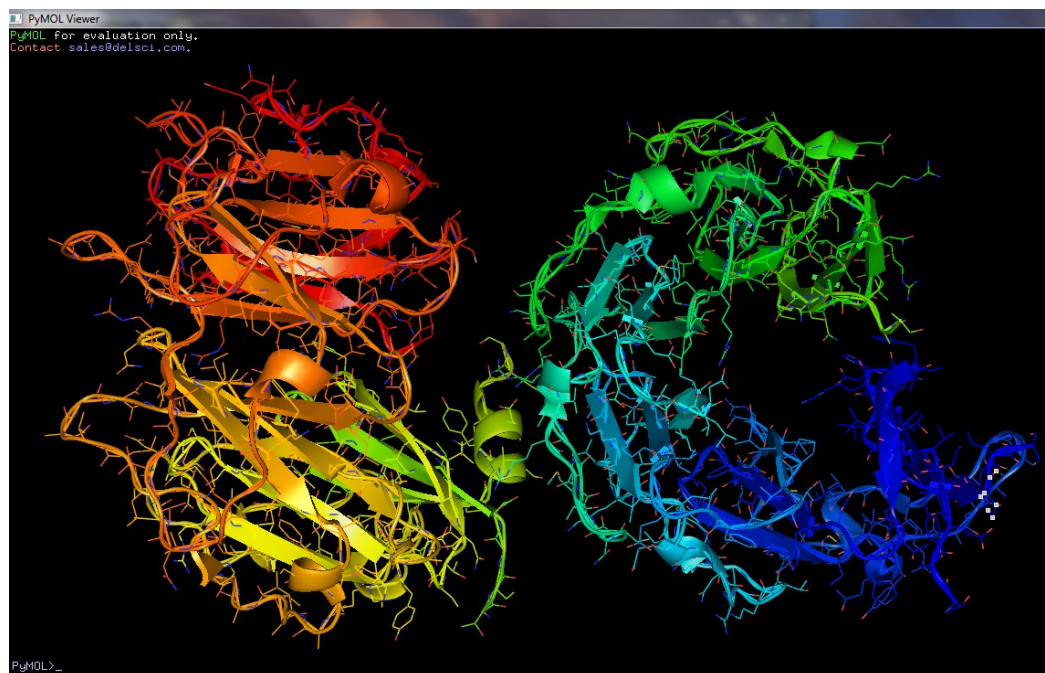

**Figure 47.** PyMOL view of DNA gyrase A (PDB ID: 1ZI0)

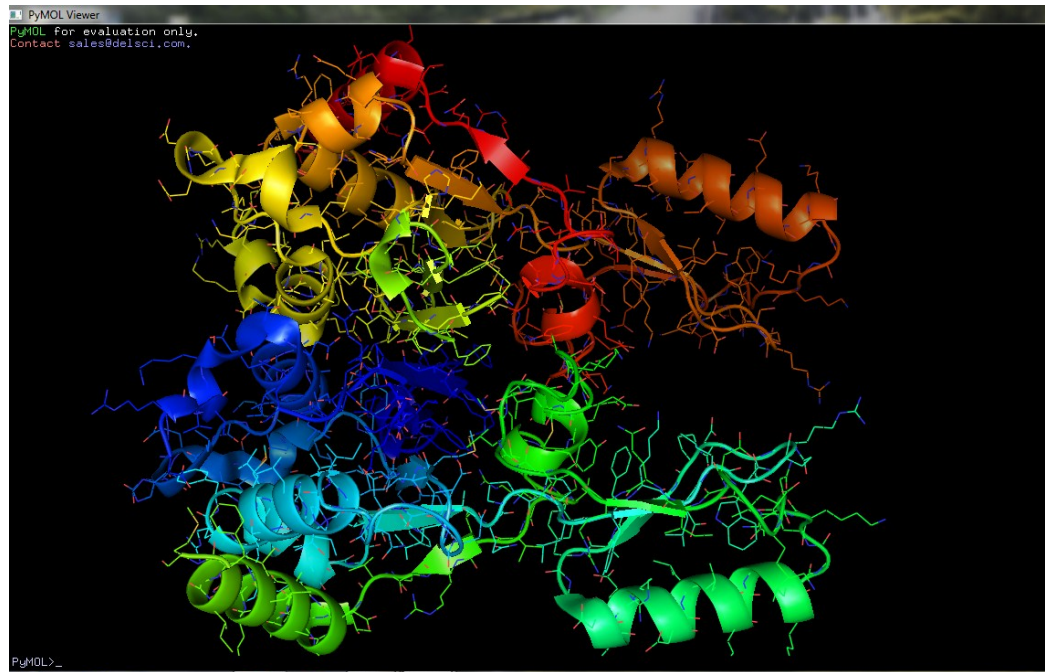

**Figure 48.** PyMOL view of DNA gyrase B (PDB ID: 2ZJT)

**Table 2.** *In vivo* efficacy of quinoline acetohydrazide derivatives **9a-n** for demonstrating antibacterial activity against selected pathogens

| <b>Entry</b> | <b>Compounds</b> | <b>IC<sub>50</sub>(mg/mL)</b> |
|--------------|------------------|-------------------------------|
|              |                  | <i>S.aureus</i>               |
| 1            | 9a               | 19.71                         |
| 2            | 9b               | 18.24                         |
| 3            | 9c               | 23.45                         |
| 4            | 9d               | 19.28                         |
| 5            | 9e               | 12.84                         |
| 6            | 9f               | 11.47                         |
| 7            | 9g               | 9.26                          |
| 8            | 9h               | 6.14                          |
| 9            | 9i               | 1.38                          |
| 10           | 9j               | 1.98                          |
| 11           | 9k               | 1.44                          |
| 12           | 9l               | 1.05                          |
| 13           | 9m               | 0.14                          |
| 14           | 9n               | 0.19                          |
| 15           | Clorobiocin      | 0.04                          |
